# Supplementary material for: An α-diiminato germylene family: syntheses, structures, and reactivity towards C–C coupled digermylene and digermylene oxide
Source: Royal Society of Chemistry journal article supplement (doi:10.1039/d2dt00981a), 2022-01-01
Supplement: d2dt00981a2.pdf [file d2dt00981a2.pdf]

## Electronic Supplementary Material (ESI) for

### **An $\alpha$ -diiminato germylene family: syntheses, structures, and reactivity towards C-C coupled digermylene and digermylene oxide**

Jingjing Liu,<sup>a</sup> Jianxuan Shang,<sup>b</sup> Jing Wei,<sup>a</sup> Fangfang Gao,<sup>a</sup> Lei Hou,<sup>a</sup> Fanlong Zeng,<sup>a</sup> Anyang Li\*<sup>a</sup> and Wenyan Wang\*<sup>a</sup>

<sup>a</sup> *Key Laboratory of Synthetic and Natural Functional Molecule of Ministry of Education, College of Chemistry and Materials Science, Northwest University, Xi'an 710127, P. R. China*

<sup>b</sup> *Shaanxi Coal and Chemical Industry, Xi'an 710054, P. R. China*

---

## Table of Contents

### A. General remarks (2)

### B. Crystal structures of 6a and 7a, crystallographic data for complexes 2-5, 6/6a and 7/7a (3)

### C. NMR spectra of 2-7 (26)

### D. Computational details (35)

### E. References (41)

#### A. General remarks

All manipulations were carried out under an atmosphere of purified nitrogen or argon using standard Schlenk lines and glovebox techniques. Glass wares were heatdried and cooled down under vacuum. Hexane was deoxygenated and then refluxed over NaH, another solvents were dried over sodium/benzophenone, distilled and deoxygenated. The solid reactants were weighed in the glove box, and liquid reagents were added with syringe or drip funnel under inert atmosphere.  $K[{}^t\text{Bu}_3\text{BH}]$ ,  $\text{AlCl}_3$  and K were purchased from Arcos. The starting materials  $\alpha$ -diimine,<sup>1</sup>  $\text{GeCl}_2\cdot\text{dioxane}$ ,<sup>2</sup>  $\text{KN}(\text{Si}^t\text{BuMe}_2)_2$ ,<sup>3</sup> and  $\text{NHC}^4$  ( $\text{NHC} = [\text{HCN}^t\text{Bu}_2\text{C}:]$ ) were prepared according to the literature procedures. Potassium was treated under vigorous stirring and refluxing in hexane under argon, and then cooled rapidly to form potassium grains. The ultra-fine potassium chips was screened and used for the reduction reactions.

The solution  ${}^1\text{H}$  and  ${}^{13}\text{C}\{{}^1\text{H}\}$  NMR spectra were recorded on Zhongke WNMN-1 400 and ECZ 400R. Chemical shifts of the deuterated solvents in  ${}^1\text{H}$  NMR data:  $\text{C}_6\text{D}_6$ , 7.16 ppm;  $\text{CDCl}_3$ , 7.26 ppm.  ${}^{13}\text{C}\{{}^1\text{H}\}$  NMR:  $\text{C}_6\text{D}_6$ , 128.06 ppm;  $\text{CDCl}_3$ , 77.16 ppm.  ${}^{27}\text{Al}\{{}^1\text{H}\}$  NMR spectra was recorded on ECZ 600R. The following abbreviations were used to describe peak patterns when appropriate: s = singlet, d = doublet, t = triplet, m = multiplet, sept = septet. Elemental analysis (C, H, N) was performed with 0.05 mL tin-capsules on a Perkin-Elmer 2400 CHN elemental analyzer. Melting points were measured in sealed glass capillaries on TD-V20G melting point apparatus under nitrogen.

The single-crystal X-ray diffractions were performed on Bruker D8 VENTURE PHOTON II diffractometer (compounds **4**, **5**, **6**, **6a** and **7** at 150 K, compounds **2** and **7a** at 90 K and 153 K, respectively) with a Ga-target Liquid X-ray source ( $\lambda = 1.34138 \text{ \AA}$ ). Compound **3** was measured on Bruker D8 Quest at 153 K with a Mo- $K\alpha$  X-ray source ( $\lambda = 0.71073 \text{ \AA}$ ). By using Olex2,<sup>5</sup> the structures were solved by direct methods with SHELXT and refined by full-matrix least-squares techniques against  $F^2$  using SHELXL-2014 programs.<sup>6</sup> All thermal displacement parameters were refined anisotropically for non-hydrogen atoms and isotropically for H atoms. The graphical representation of the molecular structures was carried out using Ortep32. Crystal data, details of data collections and refinements can be showed in Table S1-S8.

#### B. Crystal structures of 6a and 7a, crystallographic data for complexes 2-5, 6/6a and 7/7a

## Crystal structure of 6a (the structure of its enantiomer is not shown.)

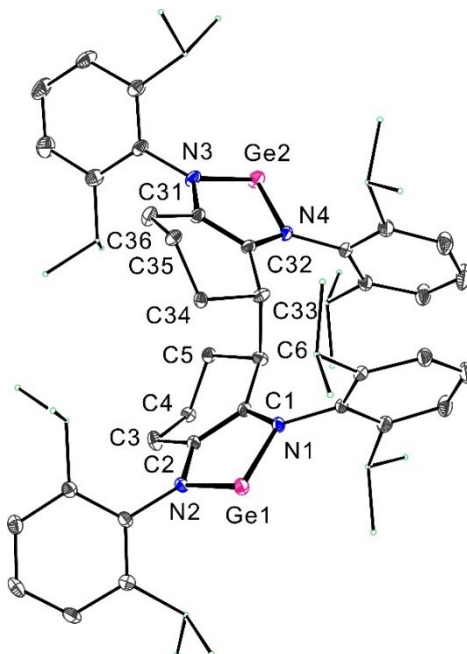

**Figure S1.** Molecular structure of **6a**. Thermal ellipsoids are drawn at the 30% probability level (except the C atoms of the *i*-Pr groups). All hydrogen atoms are omitted for clarity. Selected bond lengths (Å) and angles (°): Ge1-N1 1.8740(12), Ge1-N2 1.8563(12), Ge2-N3 1.8608(13), Ge2-N4 1.8765(12), N1-C1 1.4053(18), N2-C2 1.3959(19), C1-C2 1.362(2), N1-C7 1.4377(18), N2-C19 1.4429(18), C1-C6 1.518(2), C2-C3 1.500(2), C6-C33 1.581(2), C3-C4 1.480(3), C5-C4 1.522(6), C6-C5 1.607(5), N1-Ge1-N2 83.88(5), N3-Ge2-N4 83.62(5).

## Crystal structure of 7a

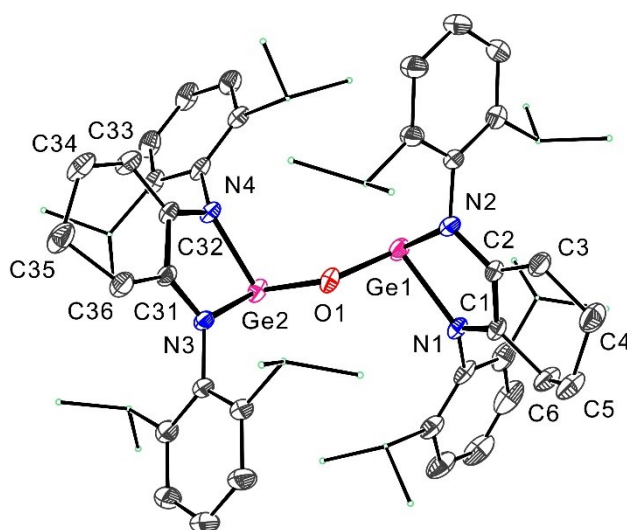

**Figure S2.** Molecular structure of **7a**. Thermal ellipsoids are drawn at the 30% probability level (except the C atoms of the *i*-Pr groups). All hydrogen atoms are omitted for clarity. Selected bond lengths (Å) and angles (°): Ge1-O1 1.807(2), Ge2-O1 1.8143(19), Ge1-N1 2.090(2), Ge1-N2 1.981(2), Ge2-N3 2.076(2), Ge2-N4 1.984(2), N1-C1 1.305(3), N2-C2 1.369(3), C1-C2 1.468(4), N1-C7 1.453(3), N2-C19 1.437(4), C1-C6 1.478(3), C2-C3 1.373(4), C3-C4 1.503(4), C5-C4 1.505(4), C6-C5 1.493(4), N3-C31 1.310(3), N4-C32 1.372(3), C32-C31 1.466(3), C32-C33 1.370(4), C33-C34 1.482(4), C34-C35 1.487(5), C36-C35 1.510(4), N1-Ge1-N2 78.42(9), N3-Ge2-N4 78.73(9), Ge1-O1-Ge2 121.17(11).

## Crystallographic data for compound 2

|                                             |                                                                |
|---------------------------------------------|----------------------------------------------------------------|
| Identification code                         | Compound 2                                                     |
| Empirical formula                           | C <sub>30</sub> H <sub>41</sub> ClGeN <sub>2</sub>             |
| Formula weight                              | 537.69                                                         |
| Temperature/K                               | 90.0                                                           |
| Crystal system                              | monoclinic                                                     |
| Space group                                 | P21/c                                                          |
| a/Å                                         | 17.622(7)                                                      |
| b/Å                                         | 10.372(3)                                                      |
| c/Å                                         | 17.159(7)                                                      |
| $\alpha$ /°                                 | 90                                                             |
| $\beta$ /°                                  | 117.354(11)                                                    |
| $\gamma$ /°                                 | 90                                                             |
| Volume/Å <sup>3</sup>                       | 2785.5(19)                                                     |
| Z                                           | 4                                                              |
| $\rho$ calc/cm <sup>3</sup>                 | 1.282                                                          |
| $\mu$ /mm <sup>-1</sup>                     | 1.685                                                          |
| F(000)                                      | 1136.0                                                         |
| Crystal size/mm <sup>3</sup>                | 0.15 × 0.12 × 0.1                                              |
| Radiation                                   | GaK $\alpha$ ( $\lambda$ = 1.34138)                            |
| 2 $\Theta$ range for data collection/°      | 4.912 to 110.132                                               |
| Index ranges                                | -21 ≤ h ≤ 21, -12 ≤ k ≤ 12, -20 ≤ l ≤ 20                       |
| Reflections collected                       | 39101                                                          |
| Independent reflections                     | 5298 [ $R_{\text{int}}$ = 0.0590, $R_{\text{sigma}}$ = 0.0369] |
| Data/restraints/parameters                  | 5298/38/315                                                    |
| Goodness-of-fit on F <sup>2</sup>           | 1.045                                                          |
| Final R indexes [ $I \geq 2\sigma(I)$ ]     | $R_1$ = 0.0435, $wR_2$ = 0.1082                                |
| Final R indexes [all data]                  | $R_1$ = 0.0601, $wR_2$ = 0.1161                                |
| Largest diff. peak/hole / e Å <sup>-3</sup> | 0.94/-0.83                                                     |

**Table S1.** Bond lengths [Å] and angles [°] for compound 2

|         |            |         |          |
|---------|------------|---------|----------|
| Ge1-Cl1 | 2.3140(10) | C20-C28 | 1.518(5) |
| Ge1-N1  | 1.904(2)   | C20-C21 | 1.396(4) |
| Ge1-N2  | 2.062(2)   | C24-C25 | 1.517(4) |
| N1-C1   | 1.383(4)   | C24-C23 | 1.395(4) |
| N1-C7   | 1.438(3)   | C11-C10 | 1.378(4) |
| N2-C19  | 1.450(4)   | C6-C5   | 1.487(4) |
| N2-C2   | 1.297(4)   | C16-C17 | 1.527(5) |
| C1-C2   | 1.461(4)   | C16-C18 | 1.518(4) |
| C1-C6   | 1.364(4)   | C25-C27 | 1.517(5) |

|             |            |             |          |
|-------------|------------|-------------|----------|
| C7-C8       | 1.396(4)   | C25-C26     | 1.525(4) |
| C7-C12      | 1.404(4)   | C13-C14     | 1.518(4) |
| C8-C9       | 1.396(4)   | C13-C15     | 1.522(5) |
| C8-C16      | 1.509(4)   | C5-C4       | 1.482(5) |
| C19-C20     | 1.398(4)   | C28-C30     | 1.532(5) |
| C19-C24     | 1.407(5)   | C28-C29     | 1.534(5) |
| C12-C11     | 1.396(4)   | C23-C22     | 1.375(5) |
| C12-C13     | 1.524(4)   | C21-C22     | 1.378(5) |
| C9-C10      | 1.377(4)   | C3-C4       | 1.440(5) |
| C2-C3       | 1.492(4)   | C1-C2-C3    | 118.3(3) |
| N1-Ge1-C11  | 99.84(8)   | C19-C20-C28 | 124.7(3) |
| N1-Ge1-N2   | 80.12(9)   | C21-C20-C19 | 116.8(3) |
| N2-Ge1-C11  | 91.48(8)   | C21-C20-C28 | 118.5(3) |
| C1-N1-Ge1   | 117.02(17) | C19-C24-C25 | 122.5(3) |
| C1-N1-C7    | 117.8(2)   | C23-C24-C19 | 117.4(3) |
| C7-N1-Ge1   | 122.77(17) | C23-C24-C25 | 120.1(3) |
| C19-N2-Ge1  | 122.44(18) | C10-C11-C12 | 120.9(3) |
| C2-N2-Ge1   | 113.91(19) | C1-C6-C5    | 123.1(3) |
| C2-N2-C19   | 123.6(2)   | C9-C10-C11  | 120.3(3) |
| N1-C1-C2    | 112.8(2)   | C8-C16-C17  | 112.0(2) |
| C6-C1-N1    | 127.1(3)   | C8-C16-C18  | 111.1(3) |
| C6-C1-C2    | 120.0(3)   | C18-C16-C17 | 110.8(3) |
| C8-C7-N1    | 119.8(2)   | C24-C25-C27 | 113.2(3) |
| C8-C7-C12   | 121.6(2)   | C24-C25-C26 | 110.3(3) |
| C12-C7-N1   | 118.6(3)   | C27-C25-C26 | 110.7(3) |
| C7-C8-C16   | 121.8(2)   | C14-C13-C12 | 112.3(3) |
| C9-C8-C7    | 118.1(3)   | C14-C13-C15 | 111.2(3) |
| C9-C8-C16   | 120.0(3)   | C15-C13-C12 | 111.0(3) |
| C20-C19-N2  | 120.0(3)   | C4-C5-C6    | 113.1(3) |
| C20-C19-C24 | 122.8(3)   | C20-C28-C30 | 110.7(3) |
| C24-C19-N2  | 117.1(3)   | C20-C28-C29 | 112.3(3) |
| C7-C12-C13  | 122.4(2)   | C30-C28-C29 | 109.5(3) |
| C11-C12-C7  | 118.0(3)   | C22-C23-C24 | 120.9(3) |
| C11-C12-C13 | 119.5(3)   | C22-C21-C20 | 121.6(3) |
| C10-C9-C8   | 121.0(3)   | C23-C22-C21 | 120.4(3) |
| N2-C2-C1    | 115.3(2)   | C4-C3-C2    | 112.7(3) |
| N2-C2-C3    | 126.0(3)   | C3-C4-C5    | 117.4(3) |

### Crystallographic data for compound 3

|                                             |                                                               |
|---------------------------------------------|---------------------------------------------------------------|
| Identification code                         | Compound 3                                                    |
| Empirical formula                           | C <sub>30</sub> H <sub>42</sub> N <sub>2</sub> Ge             |
| Formula weight                              | 503.24                                                        |
| Temperature/K                               | 153.15                                                        |
| Crystal system                              | monoclinic                                                    |
| Space group                                 | C2/c                                                          |
| a/Å                                         | 31.977(6)                                                     |
| b/Å                                         | 11.392(2)                                                     |
| c/Å                                         | 18.293(4)                                                     |
| $\alpha$ /°                                 | 90                                                            |
| $\beta$ /°                                  | 121.120(7)                                                    |
| $\gamma$ /°                                 | 90                                                            |
| Volume/Å <sup>3</sup>                       | 5704(2)                                                       |
| Z                                           | 8                                                             |
| $\rho$ calc/cm <sup>3</sup>                 | 1.172                                                         |
| $\mu$ /mm <sup>-1</sup>                     | 1.093                                                         |
| F(000)                                      | 2144.0                                                        |
| Crystal size/mm <sup>3</sup>                | 0.16 × 0.14 × 0.12                                            |
| Radiation                                   | MoK $\alpha$ ( $\lambda$ = 0.71073)                           |
| 2 $\theta$ range for data collection/°      | 5.202 to 52.944                                               |
| Index ranges                                | -36 ≤ h ≤ 39, -14 ≤ k ≤ 14, -22 ≤ l ≤ 22                      |
| Reflections collected                       | 34671                                                         |
| Independent reflections                     | 5831 [R <sub>int</sub> = 0.0390, R <sub>sigma</sub> = 0.0250] |
| Data/restraints/parameters                  | 5831/672/306                                                  |
| Goodness-of-fit on F <sup>2</sup>           | 1.040                                                         |
| Final R indexes [I ≥ 2 $\sigma$ (I)]        | R <sub>1</sub> = 0.0649, wR <sub>2</sub> = 0.1528             |
| Final R indexes [all data]                  | R <sub>1</sub> = 0.0737, wR <sub>2</sub> = 0.1599             |
| Largest diff. peak/hole / e Å <sup>-3</sup> | 2.29/-2.29                                                    |

**Table S2.** Bond lengths [Å] and angles [°] for compound 3

|        |          |         |          |
|--------|----------|---------|----------|
| Ge1-N1 | 1.868(3) | C12-C16 | 1.520(5) |
| Ge1-N2 | 1.869(3) | C13-C14 | 1.532(5) |
| N1-C1  | 1.383(5) | C13-C15 | 1.527(5) |
| N1-C7  | 1.442(4) | C16-C17 | 1.522(6) |
| C1-C2  | 1.360(5) | C16-C18 | 1.535(5) |
| C1-C6  | 1.496(5) | C19-C20 | 1.402(6) |
| N2-C2  | 1.384(5) | C19-C24 | 1.405(6) |
| N2-C19 | 1.438(5) | C20-C21 | 1.393(6) |

|             |           |             |          |
|-------------|-----------|-------------|----------|
| C2-C3       | 1.498(5)  | C20-C28     | 1.527(6) |
| C3-C4       | 1.487(6)  | C21-C22     | 1.379(6) |
| C6-C5       | 1.516(6)  | C22-C23     | 1.388(6) |
| C7-C8       | 1.404(5)  | C23-C24     | 1.396(6) |
| C7-C12      | 1.406(5)  | C24-C25     | 1.518(6) |
| C8-C9       | 1.397(5)  | C25-C26     | 1.520(6) |
| C8-C13      | 1.526(5)  | C25-C27     | 1.525(6) |
| C9-C10      | 1.390(5)  | C28-C29     | 1.521(7) |
| C10-C11     | 1.382(5)  | C28-C30     | 1.524(6) |
| C11-C12     | 1.397(5)  | C4-C5       | 1.370(6) |
| N1-Ge1-N2   | 83.08(12) | C8-C13-C14  | 111.2(3) |
| C1-N1-Ge1   | 114.7(2)  | C8-C13-C15  | 111.0(3) |
| C1-N1-C7    | 122.5(3)  | C15-C13-C14 | 111.0(3) |
| C7-N1-Ge1   | 122.7(2)  | C12-C16-C17 | 111.2(3) |
| N1-C1-C6    | 122.4(3)  | C12-C16-C18 | 111.1(3) |
| C2-C1-N1    | 113.9(3)  | C17-C16-C18 | 110.6(3) |
| C2-C1-C6    | 123.8(4)  | C20-C19-N2  | 118.7(3) |
| C2-N2-Ge1   | 114.6(2)  | C20-C19-C24 | 121.9(4) |
| C2-N2-C19   | 121.8(3)  | C24-C19-N2  | 119.4(3) |
| C19-N2-Ge1  | 123.6(2)  | C19-C20-C28 | 122.0(4) |
| C1-C2-N2    | 113.8(3)  | C21-C20-C19 | 117.5(4) |
| C1-C2-C3    | 124.1(4)  | C21-C20-C28 | 120.5(4) |
| N2-C2-C3    | 122.1(3)  | C22-C21-C20 | 121.6(4) |
| C4-C3-C2    | 111.2(3)  | C21-C22-C23 | 120.2(4) |
| C1-C6-C5    | 109.7(3)  | C22-C23-C24 | 120.5(4) |
| C8-C7-N1    | 118.6(3)  | C19-C24-C25 | 122.0(4) |
| C8-C7-C12   | 121.2(3)  | C23-C24-C19 | 118.2(4) |
| C12-C7-N1   | 120.0(3)  | C23-C24-C25 | 119.8(4) |
| C7-C8-C13   | 122.3(3)  | C24-C25-C26 | 111.5(4) |
| C9-C8-C7    | 118.1(3)  | C24-C25-C27 | 112.0(3) |
| C9-C8-C13   | 119.6(3)  | C26-C25-C27 | 110.7(4) |
| C10-C9-C8   | 121.3(4)  | C29-C28-C20 | 110.8(4) |
| C11-C10-C9  | 119.8(3)  | C29-C28-C30 | 111.2(4) |
| C10-C11-C12 | 120.9(4)  | C30-C28-C20 | 111.8(4) |
| C7-C12-C16  | 122.1(3)  | C5-C4-C3    | 120.4(4) |
| C11-C12-C7  | 118.5(3)  | C4-C5-C6    | 120.9(4) |
| C11-C12-C16 | 119.4(3)  |             |          |

**Crystallographic data for compound 4**

|                                             |                                                               |
|---------------------------------------------|---------------------------------------------------------------|
| Identification code                         | Compound 4                                                    |
| Empirical formula                           | C <sub>30</sub> H <sub>40</sub> GeN <sub>2</sub>              |
| Formula weight                              | 501.23                                                        |
| Temperature/K                               | 150.15                                                        |
| Crystal system                              | triclinic                                                     |
| Space group                                 | P-1                                                           |
| a/Å                                         | 8.9419(5)                                                     |
| b/Å                                         | 11.8530(7)                                                    |
| c/Å                                         | 13.4458(7)                                                    |
| $\alpha$ /°                                 | 101.563(2)                                                    |
| $\beta$ /°                                  | 90.578(2)                                                     |
| $\gamma$ /°                                 | 98.666(2)                                                     |
| Volume/Å <sup>3</sup>                       | 1379.04(13)                                                   |
| Z                                           | 2                                                             |
| $\rho$ calc/cm <sup>3</sup>                 | 1.207                                                         |
| $\mu$ /mm <sup>-1</sup>                     | 1.130                                                         |
| F(000)                                      | 532.0                                                         |
| Crystal size/mm <sup>3</sup>                | 0.25 × 0.23 × 0.2                                             |
| Radiation                                   | GaK $\alpha$ ( $\lambda$ = 1.34138)                           |
| 2 $\theta$ range for data collection/°      | 3.094 to 51.384                                               |
| Index ranges                                | -10 ≤ h ≤ 10, -14 ≤ k ≤ 14, -16 ≤ l ≤ 16                      |
| Reflections collected                       | 21154                                                         |
| Independent reflections                     | 5236 [R <sub>int</sub> = 0.0590, R <sub>sigma</sub> = 0.0490] |
| Data/restraints/parameters                  | 5236/0/306                                                    |
| Goodness-of-fit on F <sup>2</sup>           | 1.044                                                         |
| Final R indexes [I >= 2 $\sigma$ (I)]       | R <sub>1</sub> = 0.0429, wR <sub>2</sub> = 0.1080             |
| Final R indexes [all data]                  | R <sub>1</sub> = 0.0602, wR <sub>2</sub> = 0.1180             |
| Largest diff. peak/hole / e Å <sup>-3</sup> | 0.44/-0.74                                                    |

**Table S3.** Bond lengths [Å] and angles [°] for compound 4

|         |          |         |          |
|---------|----------|---------|----------|
| Ge1-N1  | 1.855(2) | C24-C25 | 1.512(4) |
| Ge1-N2  | 1.856(2) | C16-C17 | 1.527(4) |
| N1-C7   | 1.443(3) | C16-C18 | 1.512(5) |
| N1-C1   | 1.406(3) | C3-C4   | 1.490(4) |
| N2-C19  | 1.436(3) | C6-C5   | 1.507(4) |
| N2-C2   | 1.404(3) | C11-C10 | 1.391(4) |
| C19-C24 | 1.415(4) | C23-C22 | 1.380(4) |
| C19-C20 | 1.399(4) | C10-C9  | 1.372(4) |



|             |            |             |          |
|-------------|------------|-------------|----------|
| C2-C1       | 1.473(3)   | C13-C15     | 1.533(4) |
| C2-C3       | 1.348(4)   | C13-C14     | 1.519(4) |
| C7-C8       | 1.406(4)   | C20-C21     | 1.396(4) |
| C7-C12      | 1.404(4)   | C20-C28     | 1.516(4) |
| C1-C6       | 1.336(4)   | C22-C21     | 1.373(5) |
| C8-C16      | 1.518(4)   | C25-C26     | 1.539(4) |
| C8-C9       | 1.394(4)   | C25-C27     | 1.519(4) |
| C12-C11     | 1.387(4)   | C4-C5       | 1.517(4) |
| C12-C13     | 1.527(4)   | C28-C30     | 1.525(6) |
| C24-C23     | 1.395(4)   | C28-C29     | 1.529(5) |
| N1-Ge1-N2   | 85.64(9)   | C23-C24-C25 | 120.9(3) |
| C7-N1-Ge1   | 124.60(18) | C8-C16-C17  | 112.4(2) |
| C1-N1-Ge1   | 115.36(17) | C18-C16-C8  | 111.1(3) |
| C1-N1-C7    | 120.0(2)   | C18-C16-C17 | 109.9(3) |
| C19-N2-Ge1  | 126.08(18) | C2-C3-C4    | 120.3(3) |
| C2-N2-Ge1   | 115.08(16) | C1-C6-C5    | 120.2(3) |
| C2-N2-C19   | 118.2(2)   | C12-C11-C10 | 120.8(3) |
| C24-C19-N2  | 118.3(2)   | C22-C23-C24 | 121.3(3) |
| C20-C19-N2  | 120.4(2)   | C9-C10-C11  | 120.0(3) |
| C20-C19-C24 | 121.3(2)   | C12-C13-C15 | 111.9(3) |
| N2-C2-C1    | 112.2(2)   | C14-C13-C12 | 111.2(3) |
| C3-C2-N2    | 126.9(2)   | C14-C13-C15 | 110.5(3) |
| C3-C2-C1    | 120.8(3)   | C19-C20-C28 | 121.8(3) |
| C8-C7-N1    | 119.6(2)   | C21-C20-C19 | 118.5(3) |
| C12-C7-N1   | 119.0(2)   | C21-C20-C28 | 119.6(3) |
| C12-C7-C8   | 121.4(2)   | C21-C22-C23 | 120.5(3) |
| N1-C1-C2    | 111.5(2)   | C10-C9-C8   | 121.5(3) |
| C6-C1-N1    | 127.3(2)   | C22-C21-C20 | 120.8(3) |
| C6-C1-C2    | 121.2(2)   | C24-C25-C26 | 109.6(3) |
| C7-C8-C16   | 121.9(2)   | C24-C25-C27 | 113.8(3) |
| C9-C8-C7    | 117.7(3)   | C27-C25-C26 | 110.1(3) |
| C9-C8-C16   | 120.4(3)   | C3-C4-C5    | 114.3(3) |
| C7-C12-C13  | 121.6(2)   | C6-C5-C4    | 113.5(3) |
| C11-C12-C7  | 118.4(3)   | C20-C28-C30 | 109.8(3) |
| C11-C12-C13 | 120.0(2)   | C20-C28-C29 | 112.1(3) |
| C19-C24-C25 | 121.4(2)   | C30-C28-C29 | 110.8(3) |
| C23-C24-C19 | 117.5(3)   |             |          |

### Crystallographic data for compound 5

Identification code

Compound 5

|                                             |                                                                                                  |
|---------------------------------------------|--------------------------------------------------------------------------------------------------|
| Empirical formula                           | C <sub>81</sub> H <sub>106</sub> Al <sub>4</sub> Cl <sub>14</sub> Ge <sub>2</sub> N <sub>4</sub> |
| Formula weight                              | 1885.09                                                                                          |
| Temperature/K                               | 150.15                                                                                           |
| Crystal system                              | monoclinic                                                                                       |
| Space group                                 | C2/c                                                                                             |
| a/Å                                         | 23.395(3)                                                                                        |
| b/Å                                         | 10.6792(12)                                                                                      |
| c/Å                                         | 37.715(4)                                                                                        |
| α/°                                         | 90                                                                                               |
| β/°                                         | 96.837(4)                                                                                        |
| γ/°                                         | 90                                                                                               |
| Volume/Å <sup>3</sup>                       | 9356.0(18)                                                                                       |
| Z                                           | 4                                                                                                |
| ρ <sub>calc</sub> /cm <sup>3</sup>          | 1.338                                                                                            |
| μ/mm <sup>-1</sup>                          | 1.122                                                                                            |
| F(000)                                      | 3896.0                                                                                           |
| Crystal size/mm <sup>3</sup>                | 0.3 × 0.2 × 0.1                                                                                  |
| Radiation                                   | GaKα (λ = 1.34138)                                                                               |
| 2θ range for data collection/°              | 3.506 to 51.416                                                                                  |
| Index ranges                                | -28 ≤ h ≤ 28, -13 ≤ k ≤ 13, -45 ≤ l ≤ 45                                                         |
| Reflections collected                       | 49758                                                                                            |
| Independent reflections                     | 8863 [R <sub>int</sub> = 0.0513, R <sub>sigma</sub> = 0.0348]                                    |
| Data/restraints/parameters                  | 8863/0/485                                                                                       |
| Goodness-of-fit on F <sup>2</sup>           | 1.041                                                                                            |
| Final R indexes [I ≥ 2σ(I)]                 | R <sub>1</sub> = 0.0414, wR <sub>2</sub> = 0.1261                                                |
| Final R indexes [all data]                  | R <sub>1</sub> = 0.0460, wR <sub>2</sub> = 0.1313                                                |
| Largest diff. peak/hole / e Å <sup>-3</sup> | 0.61/-1.05                                                                                       |

**Table S4.** Bond lengths [Å] and angles [°] for compound **5**

|         |            |         |          |
|---------|------------|---------|----------|
| Ge1-N1  | 1.9123(19) | C13-C14 | 1.526(3) |
| Ge1-N2  | 1.9180(19) | C13-C15 | 1.534(4) |
| Cl1-Al1 | 2.1066(11) | C16-C17 | 1.529(4) |
| Al1-Cl2 | 2.0960(12) | C16-C18 | 1.529(3) |
| Al1-Cl3 | 2.1142(11) | C19-C20 | 1.402(3) |
| Al1-Cl4 | 2.2749(10) | C19-C24 | 1.402(3) |
| N1-C1   | 1.351(3)   | C20-C21 | 1.402(3) |
| N1-C7   | 1.449(3)   | C20-C28 | 1.518(3) |
| C1-C2   | 1.455(3)   | C21-C22 | 1.374(4) |
| C1-C6   | 1.418(3)   | C22-C23 | 1.384(4) |

---

|             |            |             |          |
|-------------|------------|-------------|----------|
| Al2-C14     | 2.2560(10) | C23-C24     | 1.400(3) |
| Al2-C15     | 2.1048(11) | C24-C25     | 1.522(3) |
| Al2-C16     | 2.0939(10) | C25-C26     | 1.533(4) |
| Al2-C17     | 2.1087(10) | C25-C27     | 1.524(3) |
| N2-C2       | 1.351(3)   | C28-C29     | 1.518(4) |
| N2-C19      | 1.457(3)   | C28-C30     | 1.526(5) |
| C2-C3       | 1.412(3)   | C31-C32     | 1.395(5) |
| C3-C4       | 1.457(4)   | C31-C36     | 1.393(4) |
| C4-C5       | 1.473(4)   | C31-C37     | 1.503(5) |
| C5-C6       | 1.469(4)   | C32-C33     | 1.385(5) |
| C7-C8       | 1.401(3)   | C33-C34     | 1.368(5) |
| C7-C12      | 1.401(3)   | C34-C35     | 1.376(5) |
| C8-C9       | 1.396(3)   | C35-C36     | 1.383(5) |
| C8-C16      | 1.525(3)   | C38-C39     | 1.384(4) |
| C9-C10      | 1.384(4)   | C38-C391    | 1.384(4) |
| C10-C11     | 1.383(4)   | C39-C40     | 1.378(5) |
| C11-C12     | 1.401(3)   | C40-C41     | 1.392(4) |
| C12-C13     | 1.525(3)   | C41-C42     | 1.505(7) |
| N1-Ge1-N2   | 82.32(8)   | C11-C12-C7  | 117.2(2) |
| C11-Al1-C13 | 113.49(5)  | C11-C12-C13 | 121.1(2) |
| C11-Al1-C14 | 100.86(4)  | C12-C13-C14 | 112.7(2) |
| C12-Al1-C11 | 114.20(5)  | C12-C13-C15 | 111.3(2) |
| C12-Al1-C13 | 113.81(5)  | C14-C13-C15 | 110.1(2) |
| C12-Al1-C14 | 107.51(5)  | C8-C16-C17  | 110.4(2) |
| C13-Al1-C14 | 105.51(4)  | C8-C16-C18  | 112.5(2) |
| C1-N1-Ge1   | 115.49(15) | C17-C16-C18 | 111.5(2) |
| C1-N1-C7    | 121.85(18) | C20-C19-N2  | 118.4(2) |
| C7-N1-Ge1   | 122.63(14) | C20-C19-C24 | 122.9(2) |
| N1-C1-C2    | 113.59(19) | C24-C19-N2  | 118.7(2) |
| N1-C1-C6    | 126.1(2)   | C19-C20-C21 | 117.2(2) |
| C6-C1-C2    | 120.3(2)   | C19-C20-C28 | 122.6(2) |
| C15-Al2-C14 | 104.89(4)  | C21-C20-C28 | 120.2(2) |
| C15-Al2-C17 | 113.05(5)  | C22-C21-C20 | 121.1(2) |
| C16-Al2-C14 | 105.57(4)  | C21-C22-C23 | 120.5(2) |
| C16-Al2-C15 | 116.67(5)  | C22-C23-C24 | 121.1(2) |
| C16-Al2-C17 | 111.53(5)  | C19-C24-C25 | 121.8(2) |
| C17-Al2-C14 | 103.73(4)  | C23-C24-C19 | 117.1(2) |
| C2-N2-Ge1   | 115.71(15) | C23-C24-C25 | 121.1(2) |
| C2-N2-C19   | 121.77(18) | C24-C25-C26 | 111.1(2) |
| C19-N2-Ge1  | 122.46(14) | C24-C25-C27 | 112.7(2) |
| N2-C2-C1    | 112.87(19) | C27-C25-C26 | 111.1(2) |

---

|             |            |              |          |
|-------------|------------|--------------|----------|
| N2-C2-C3    | 126.6(2)   | C20-C28-C30  | 110.4(3) |
| C3-C2-C1    | 120.6(2)   | C29-C28-C20  | 111.8(2) |
| C2-C3-C4    | 119.1(2)   | C29-C28-C30  | 110.4(3) |
| A12-C14-A11 | 110.82(4)  | C32-C31-C37  | 121.8(3) |
| C3-C4-C5    | 117.2(3)   | C36-C31-C32  | 117.6(3) |
| C6-C5-C4    | 115.9(3)   | C36-C31-C37  | 120.5(3) |
| C1-C6-C5    | 117.8(2)   | C33-C32-C31  | 120.9(3) |
| C8-C7-N1    | 118.4(2)   | C34-C33-C32  | 120.6(3) |
| C12-C7-N1   | 118.43(19) | C33-C34-C35  | 119.5(3) |
| C12-C7-C8   | 123.1(2)   | C34-C35-C36  | 120.6(3) |
| C7-C8-C16   | 122.0(2)   | C35-C36-C31  | 120.9(3) |
| C9-C8-C7    | 117.3(2)   | C391-C38-C39 | 119.4(5) |
| C9-C8-C16   | 120.7(2)   | C40-C39-C38  | 120.0(3) |
| C10-C9-C8   | 120.7(2)   | C39-C40-C41  | 121.6(3) |
| C11-C10-C9  | 120.9(2)   | C401-C41-C40 | 117.3(4) |
| C10-C11-C12 | 120.7(2)   | C401-C41-C42 | 121.3(2) |
| C7-C12-C13  | 121.7(2)   | C40-C41-C42  | 121.3(2) |

### Crystallographic data for compound 6

|                                        |                                                                |
|----------------------------------------|----------------------------------------------------------------|
| Identification code                    | Compound 6                                                     |
| Empirical formula                      | C <sub>60</sub> H <sub>82</sub> Ge <sub>2</sub> N <sub>4</sub> |
| Formula weight                         | 1004.47                                                        |
| Temperature/K                          | 150.15                                                         |
| Crystal system                         | monoclinic                                                     |
| Space group                            | P21/n                                                          |
| a/Å                                    | 12.8471(7)                                                     |
| b/Å                                    | 12.1217(7)                                                     |
| c/Å                                    | 18.1718(9)                                                     |
| $\alpha$ /°                            | 90                                                             |
| $\beta$ /°                             | 104.017(2)                                                     |
| $\gamma$ /°                            | 90                                                             |
| Volume/Å <sup>3</sup>                  | 2745.6(3)                                                      |
| Z                                      | 2                                                              |
| $\rho_{\text{calc}}/\text{cm}^3$       | 1.215                                                          |
| $\mu/\text{mm}^{-1}$                   | 1.135                                                          |
| F(000)                                 | 1068.0                                                         |
| Crystal size/mm <sup>3</sup>           | 0.3 × 0.25 × 0.2                                               |
| Radiation                              | GaK $\alpha$ ( $\lambda$ = 1.34138)                            |
| 2 $\theta$ range for data collection/° | 3.516 to 51.532                                                |
| Index ranges                           | -15 ≤ h ≤ 15, -14 ≤ k ≤ 13, -22 ≤ l ≤ 21                       |

|                                                |                                                                  |
|------------------------------------------------|------------------------------------------------------------------|
| Reflections collected                          | 35478                                                            |
| Independent reflections                        | 5223 [ $R_{\text{int}} = 0.1508$ , $R_{\text{sigma}} = 0.0859$ ] |
| Data/restraints/parameters                     | 5223/0/306                                                       |
| Goodness-of-fit on $F^2$                       | 1.020                                                            |
| Final R indexes [ $I \geq 2\sigma(I)$ ]        | $R_1 = 0.0549$ , $wR_2 = 0.1265$                                 |
| Final R indexes [all data]                     | $R_1 = 0.1059$ , $wR_2 = 0.1460$                                 |
| Largest diff. peak/hole / $e \text{ \AA}^{-3}$ | 0.44/-0.78                                                       |

**Table S5.** Bond lengths [ $\text{\AA}$ ] and angles [ $^\circ$ ] for compound **6**

|             |           |             |          |
|-------------|-----------|-------------|----------|
| Ge1-N1      | 1.878(3)  | C7-C8       | 1.410(5) |
| Ge1-N2      | 1.863(3)  | C8-C16      | 1.534(5) |
| N1-C1       | 1.404(5)  | C8-C9       | 1.407(5) |
| N1-C7       | 1.451(4)  | C28-C30     | 1.533(6) |
| N2-C2       | 1.391(4)  | C28-C29     | 1.503(7) |
| N2-C19      | 1.440(4)  | C16-C18     | 1.530(6) |
| C12-C13     | 1.521(5)  | C16-C17     | 1.533(6) |
| C12-C7      | 1.403(5)  | C19-C24     | 1.412(5) |
| C12-C11     | 1.406(5)  | C10-C11     | 1.363(6) |
| C1-C2       | 1.359(5)  | C10-C9      | 1.373(6) |
| C1-C6       | 1.512(5)  | C4-C3       | 1.505(5) |
| C5-C4       | 1.542(5)  | C22-C23     | 1.373(6) |
| C5-C6       | 1.535(5)  | C22-C21     | 1.374(6) |
| C2-C3       | 1.492(5)  | C6-C61      | 1.547(7) |
| C20-C28     | 1.522(5)  | C23-C24     | 1.393(5) |
| C20-C19     | 1.397(5)  | C24-C26     | 1.517(6) |
| C20-C21     | 1.411(5)  | C26-C25     | 1.523(7) |
| C13-C15     | 1.529(5)  | C26-C27     | 1.504(6) |
| C13-C14     | 1.529(6)  | C6-C6'      | 1.548    |
| N2-Ge1-N1   | 83.97(13) | C9-C8-C16   | 117.8(3) |
| C1-N1-Ge1   | 114.0(2)  | C20-C28-C30 | 111.0(3) |
| C1-N1-C7    | 124.0(3)  | C29-C28-C20 | 111.7(4) |
| C7-N1-Ge1   | 122.0(2)  | C29-C28-C30 | 111.9(4) |
| C2-N2-Ge1   | 113.7(2)  | C18-C16-C8  | 110.0(4) |
| C2-N2-C19   | 121.0(3)  | C18-C16-C17 | 109.7(3) |
| C19-N2-Ge1  | 124.8(2)  | C17-C16-C8  | 113.3(3) |
| C7-C12-C13  | 123.3(3)  | C20-C19-N2  | 119.4(3) |
| C7-C12-C11  | 117.6(3)  | C20-C19-C24 | 121.9(3) |
| C11-C12-C13 | 119.0(3)  | C24-C19-N2  | 118.6(3) |
| N1-C1-C6    | 126.5(3)  | C11-C10-C9  | 120.6(4) |
| C2-C1-N1    | 112.9(3)  | C3-C4-C5    | 116.7(3) |
| C2-C1-C6    | 120.4(3)  | C10-C11-C12 | 121.6(4) |

|             |          |             |          |
|-------------|----------|-------------|----------|
| C6-C5-C4    | 114.9(3) | C23-C22-C21 | 120.3(3) |
| N2-C2-C3    | 122.5(3) | C1-C6-C5    | 106.7(3) |
| C1-C2-N2    | 115.4(3) | C1-C6-C61   | 113.6(3) |
| C1-C2-C3    | 121.9(3) | C5-C6-C61   | 112.0(4) |
| C19-C20-C28 | 122.0(3) | C2-C3-C4    | 112.9(3) |
| C19-C20-C21 | 117.9(3) | C22-C23-C24 | 122.1(4) |
| C21-C20-C28 | 120.1(4) | C19-C24-C26 | 122.0(3) |
| C12-C13-C15 | 112.9(3) | C23-C24-C19 | 117.0(4) |
| C12-C13-C14 | 109.8(3) | C23-C24-C26 | 120.9(3) |
| C14-C13-C15 | 110.1(3) | C22-C21-C20 | 120.7(4) |
| C12-C7-N1   | 119.7(3) | C10-C9-C8   | 120.8(4) |
| C12-C7-C8   | 121.3(3) | C24-C26-C25 | 111.6(4) |
| C8-C7-N1    | 118.8(3) | C27-C26-C24 | 111.5(4) |
| C7-C8-C16   | 124.2(3) | C27-C26-C25 | 111.4(4) |
| C9-C8-C7    | 117.9(4) |             |          |

### Crystallographic data for compound 6a

|                                         |                                                                |
|-----------------------------------------|----------------------------------------------------------------|
| Identification code                     | Compound 6a                                                    |
| Empirical formula                       | C <sub>60</sub> H <sub>82</sub> Ge <sub>2</sub> N <sub>4</sub> |
| Formula weight                          | 1004.47                                                        |
| Temperature/K                           | 150.0                                                          |
| Crystal system                          | triclinic                                                      |
| Space group                             | P-1                                                            |
| a/Å                                     | 13.3724(9)                                                     |
| b/Å                                     | 14.6460(9)                                                     |
| c/Å                                     | 15.5895(11)                                                    |
| $\alpha$ /°                             | 93.181(3)                                                      |
| $\beta$ /°                              | 92.200(3)                                                      |
| $\gamma$ /°                             | 114.758(3)                                                     |
| Volume/Å <sup>3</sup>                   | 2761.9(3)                                                      |
| Z                                       | 2                                                              |
| $\rho$ <sub>calc</sub> /cm <sup>3</sup> | 1.208                                                          |
| $\mu$ /mm <sup>-1</sup>                 | 1.108                                                          |
| F(000)                                  | 1068.0                                                         |
| Crystal size/mm <sup>3</sup>            | 0.2 × 0.18 × 0.15                                              |
| Radiation                               | GaK $\alpha$ ( $\lambda$ = 1.34138)                            |
| 2 $\theta$ range for data collection/°  | 4.95 to 110.012                                                |
| Index ranges                            | -16 ≤ h ≤ 16, -17 ≤ k ≤ 17, -19 ≤ l ≤ 19                       |
| Reflections collected                   | 61048                                                          |
| Independent reflections                 | 10496 [ $R_{int}$ = 0.0471, $R_{sigma}$ = 0.0304]              |

|                                             |                                                   |
|---------------------------------------------|---------------------------------------------------|
| Data/restraints/parameters                  | 10496/6/647                                       |
| Goodness-of-fit on F <sup>2</sup>           | 1.057                                             |
| Final R indexes [I>2σ(I)]                   | R <sub>1</sub> = 0.0281, wR <sub>2</sub> = 0.0724 |
| Final R indexes [all data]                  | R <sub>1</sub> = 0.0335, wR <sub>2</sub> = 0.0752 |
| Largest diff. peak/hole / e Å <sup>-3</sup> | 0.29/-0.39                                        |

**Table S6.** Bond lengths [Å] and angles [°] for compound **6a**

|         |            |          |          |
|---------|------------|----------|----------|
| Ge1-N1  | 1.8740(12) | C50-C51  | 1.397(2) |
| Ge1-N2  | 1.8563(12) | C13-C15  | 1.538(2) |
| Ge2-N4  | 1.8765(12) | C13-C14  | 1.531(2) |
| Ge2-N3  | 1.8608(13) | C11-C10  | 1.377(2) |
| N1-C7   | 1.4377(18) | C3-C4    | 1.480(3) |
| N1-C1   | 1.4053(18) | C3-C4A   | 1.608(4) |
| N4-C32  | 1.3991(19) | C25-C26  | 1.536(2) |
| N4-C49  | 1.4388(19) | C25-C27  | 1.533(2) |
| N3-C31  | 1.3944(19) | C23-C22  | 1.385(2) |
| N3-C37  | 1.4434(19) | C9-C10   | 1.384(2) |
| N2-C19  | 1.4429(18) | C54-C55  | 1.525(2) |
| N2-C2   | 1.3959(19) | C54-C53  | 1.390(2) |
| C31-C32 | 1.359(2)   | C21-C22  | 1.376(2) |
| C31-C36 | 1.502(2)   | C16-C18  | 1.528(2) |
| C7-C12  | 1.411(2)   | C16-C17  | 1.534(2) |
| C7-C8   | 1.420(2)   | C55-C56  | 1.522(2) |
| C19-C24 | 1.406(2)   | C55-C57  | 1.534(3) |
| C19-C20 | 1.408(2)   | C33-C34A | 1.511(3) |
| C32-C33 | 1.514(2)   | C33-C34  | 1.676(6) |
| C12-C13 | 1.530(2)   | C58-C60  | 1.533(2) |
| C12-C11 | 1.395(2)   | C58-C59  | 1.529(2) |
| C1-C2   | 1.362(2)   | C36-C35A | 1.556(3) |
| C1-C6   | 1.518(2)   | C36-C35  | 1.477(5) |
| C2-C3   | 1.500(2)   | C43-C44  | 1.525(2) |
| C37-C42 | 1.405(2)   | C43-C45  | 1.533(2) |
| C37-C38 | 1.405(2)   | C38-C39  | 1.394(2) |
| C24-C25 | 1.525(2)   | C38-C46  | 1.522(2) |
| C24-C23 | 1.392(2)   | C51-C52  | 1.382(3) |
| C8-C9   | 1.388(2)   | C28-C29  | 1.534(3) |
| C8-C16  | 1.528(2)   | C28-C30  | 1.526(3) |
| C42-C43 | 1.518(2)   | C41-C40  | 1.376(3) |
| C42-C41 | 1.394(2)   | C53-C52  | 1.381(3) |
| C49-C50 | 1.408(2)   | C39-C40  | 1.381(3) |
| C49-C54 | 1.416(2)   | C46-C48  | 1.525(3) |

|             |            |              |            |
|-------------|------------|--------------|------------|
| C6-C33      | 1.581(2)   | C46-C47      | 1.538(3)   |
| C6-C5       | 1.607(5)   | C5-C4        | 1.522(6)   |
| C6-C5A      | 1.512(5)   | C34A-C35A    | 1.515(4)   |
| C20-C21     | 1.399(2)   | C35-C34      | 1.509(8)   |
| C20-C28     | 1.523(2)   | C4A-C5A      | 1.504(6)   |
| C50-C58     | 1.525(2)   |              |            |
| N2-Ge1-N1   | 83.88(5)   | C51-C50-C58  | 118.05(14) |
| N3-Ge2-N4   | 83.62(5)   | C12-C13-C15  | 111.51(13) |
| C7-N1-Ge1   | 121.67(9)  | C12-C13-C14  | 111.49(13) |
| C1-N1-Ge1   | 114.19(9)  | C14-C13-C15  | 109.32(14) |
| C1-N1-C7    | 122.92(12) | C10-C11-C12  | 121.68(14) |
| C32-N4-Ge2  | 114.26(9)  | C2-C3-C4A    | 108.82(16) |
| C32-N4-C49  | 122.97(12) | C4-C3-C2     | 109.27(16) |
| C49-N4-Ge2  | 121.37(10) | C24-C25-C26  | 112.52(14) |
| C31-N3-Ge2  | 114.26(10) | C24-C25-C27  | 110.26(14) |
| C31-N3-C37  | 120.49(13) | C27-C25-C26  | 110.13(14) |
| C37-N3-Ge2  | 125.05(10) | C22-C23-C24  | 121.30(15) |
| C19-N2-Ge1  | 124.73(10) | C10-C9-C8    | 121.61(15) |
| C2-N2-Ge1   | 114.24(9)  | C49-C54-C55  | 122.02(14) |
| C2-N2-C19   | 120.79(12) | C53-C54-C49  | 118.50(15) |
| N3-C31-C36  | 120.26(13) | C53-C54-C55  | 119.21(14) |
| C32-C31-N3  | 114.59(13) | C22-C21-C20  | 121.30(15) |
| C32-C31-C36 | 125.01(14) | C8-C16-C17   | 109.78(13) |
| C12-C7-N1   | 119.96(13) | C18-C16-C8   | 113.41(14) |
| C12-C7-C8   | 120.56(13) | C18-C16-C17  | 109.83(14) |
| C8-C7-N1    | 119.27(13) | C54-C55-C57  | 109.23(15) |
| C24-C19-N2  | 119.23(13) | C56-C55-C54  | 112.92(14) |
| C24-C19-C20 | 121.40(14) | C56-C55-C57  | 110.65(14) |
| C20-C19-N2  | 119.34(13) | C32-C33-C6   | 112.19(12) |
| N4-C32-C33  | 123.77(13) | C32-C33-C34  | 107.3(2)   |
| C31-C32-N4  | 113.24(13) | C6-C33-C34   | 101.4(3)   |
| C31-C32-C33 | 122.83(14) | C34A-C33-C32 | 108.70(15) |
| C7-C12-C13  | 124.67(13) | C34A-C33-C6  | 120.04(17) |
| C11-C12-C7  | 118.17(13) | C11-C10-C9   | 119.62(14) |
| C11-C12-C13 | 117.14(13) | C50-C58-C60  | 111.32(14) |
| N1-C1-C6    | 123.89(12) | C50-C58-C59  | 111.48(14) |
| C2-C1-N1    | 112.93(13) | C59-C58-C60  | 110.76(15) |
| C2-C1-C6    | 122.97(13) | C21-C22-C23  | 119.96(15) |
| N2-C2-C3    | 120.58(13) | C31-C36-C35A | 109.74(14) |
| C1-C2-N2    | 114.70(13) | C35-C36-C31  | 110.5(2)   |
| C1-C2-C3    | 124.59(14) | C42-C43-C44  | 110.84(14) |



|             |            |               |            |
|-------------|------------|---------------|------------|
| C42-C37-N3  | 119.24(14) | C42-C43-C45   | 111.58(15) |
| C42-C37-C38 | 121.53(14) | C44-C43-C45   | 110.17(15) |
| C38-C37-N3  | 119.22(14) | C37-C38-C46   | 122.80(15) |
| C19-C24-C25 | 122.47(13) | C39-C38-C37   | 118.03(15) |
| C23-C24-C19 | 118.11(14) | C39-C38-C46   | 119.16(16) |
| C23-C24-C25 | 119.37(14) | C52-C51-C50   | 121.60(16) |
| C7-C8-C16   | 122.11(13) | C20-C28-C29   | 111.99(15) |
| C9-C8-C7    | 118.16(14) | C20-C28-C30   | 110.94(17) |
| C9-C8-C16   | 119.43(14) | C30-C28-C29   | 110.01(17) |
| C37-C42-C43 | 123.01(14) | C40-C41-C42   | 121.29(16) |
| C41-C42-C37 | 117.85(15) | C52-C53-C54   | 121.47(16) |
| C41-C42-C43 | 119.13(15) | C40-C39-C38   | 121.00(17) |
| C50-C49-N4  | 120.09(13) | C41-C40-C39   | 120.23(16) |
| C50-C49-C54 | 120.52(14) | C38-C46-C48   | 110.40(17) |
| C54-C49-N4  | 119.16(13) | C38-C46-C47   | 112.06(17) |
| C1-C6-C33   | 112.72(12) | C48-C46-C47   | 109.85(19) |
| C1-C6-C5    | 107.2(2)   | C53-C52-C51   | 119.55(16) |
| C33-C6-C5   | 105.8(2)   | C4-C5-C6      | 112.3(3)   |
| C5A-C6-C1   | 110.3(2)   | C33-C34A-C35A | 112.5(2)   |
| C5A-C6-C33  | 121.2(2)   | C34A-C35A-C36 | 111.9(2)   |
| C19-C20-C28 | 122.56(14) | C3-C4-C5      | 106.5(3)   |
| C21-C20-C19 | 117.92(14) | C36-C35-C34   | 106.4(4)   |
| C21-C20-C28 | 119.52(14) | C35-C34-C33   | 112.3(5)   |
| C49-C50-C58 | 123.68(14) | C5A-C4A-C3    | 110.7(3)   |
| C51-C50-C49 | 118.24(14) | C4A-C5A-C6    | 112.5(3)   |

### Crystallographic data for compound 7

|                       |                                                                                 |
|-----------------------|---------------------------------------------------------------------------------|
| Identification code   | Compound 7                                                                      |
| Empirical formula     | C <sub>120</sub> H <sub>164</sub> Ge <sub>4</sub> N <sub>8</sub> O <sub>2</sub> |
| Formula weight        | 2040.94                                                                         |
| Temperature/K         | 150(2)                                                                          |
| Crystal system        | orthorhombic                                                                    |
| Space group           | P212121                                                                         |
| a/Å                   | 13.4853(5)                                                                      |
| b/Å                   | 24.7376(13)                                                                     |
| c/Å                   | 34.1042(18)                                                                     |
| $\alpha$ /°           | 90                                                                              |
| $\beta$ /°            | 90                                                                              |
| $\gamma$ /°           | 90                                                                              |
| Volume/Å <sup>3</sup> | 11377.0(9)                                                                      |

|                                                |                                                                |
|------------------------------------------------|----------------------------------------------------------------|
| Z                                              | 4                                                              |
| $\rho_{\text{calc}}/\text{cm}^3$               | 1.192                                                          |
| $\mu/\text{mm}^{-1}$                           | 1.089                                                          |
| F(000)                                         | 4336.0                                                         |
| Crystal size/ $\text{mm}^3$                    | $0.15 \times 0.13 \times 0.10$                                 |
| Radiation                                      | GaK $\alpha$ ( $\lambda = 1.34138$ )                           |
| $2\theta$ range for data collection/ $^\circ$  | 3.838 to 109.822                                               |
| Index ranges                                   | $-16 \leq h \leq 14, -30 \leq k \leq 30, -41 \leq l \leq 40$   |
| Reflections collected                          | 142714                                                         |
| Independent reflections                        | 21579 [ $R_{\text{int}} = 0.0814, R_{\text{sigma}} = 0.0511$ ] |
| Data/restraints/parameters                     | 21579/16/1270                                                  |
| Goodness-of-fit on $F^2$                       | 1.009                                                          |
| Final R indexes [ $I \geq 2\sigma(I)$ ]        | $R_1 = 0.0365, wR_2 = 0.0909$                                  |
| Final R indexes [all data]                     | $R_1 = 0.0441, wR_2 = 0.0950$                                  |
| Largest diff. peak/hole / $e \text{ \AA}^{-3}$ | 0.31/-0.51                                                     |
| Flack parameter                                | 0.036(10)                                                      |

**Table S7.** Bond lengths [ $\text{\AA}$ ] and angles [ $^\circ$ ] for compound 7

|         |          |           |          |
|---------|----------|-----------|----------|
| Ge1-O1  | 1.813(2) | C97-C102  | 1.414(7) |
| Ge1-N1  | 2.011(3) | C39-C40   | 1.369(7) |
| Ge1-N2  | 2.044(3) | C58-C60   | 1.518(6) |
| Ge2-O1  | 1.808(3) | C58-C59   | 1.528(7) |
| Ge2-N4  | 2.030(3) | C73-C74   | 1.530(6) |
| Ge2-N3  | 2.047(3) | C73-C75   | 1.531(7) |
| Ge3-O2  | 1.817(3) | C6-C5     | 1.473(7) |
| Ge3-N6  | 2.008(3) | C118-C110 | 1.516(7) |
| Ge3-N5  | 2.055(3) | C118-C120 | 1.523(7) |
| Ge4-O2  | 1.811(3) | C118-C119 | 1.532(7) |
| Ge4-N7  | 2.026(3) | C8-C9     | 1.402(6) |
| Ge4-N8  | 2.036(4) | C8-C13    | 1.522(7) |
| N1-C1   | 1.347(5) | C9-C10    | 1.364(7) |
| N1-C7   | 1.439(5) | C53-C52   | 1.391(7) |
| N5-C61  | 1.311(5) | C102-C101 | 1.394(7) |
| N5-C67  | 1.435(5) | C102-C103 | 1.496(7) |
| N3-C31  | 1.339(5) | C80-C81   | 1.392(6) |
| N3-C37  | 1.436(5) | C80-C79   | 1.406(6) |
| N2-C2   | 1.325(5) | C11-C10   | 1.375(7) |
| N2-C19  | 1.440(5) | C109-C110 | 1.407(7) |
| N4-C32  | 1.328(5) | C109-C114 | 1.413(6) |
| N4-C49  | 1.448(5) | C16-C18   | 1.521(6) |
| C49-C54 | 1.403(6) | C16-C17   | 1.524(7) |

---

|         |          |           |           |
|---------|----------|-----------|-----------|
| C49-C50 | 1.406(6) | C51-C52   | 1.377(7)  |
| N6-C62  | 1.362(5) | C110-C111 | 1.401(6)  |
| N6-C79  | 1.436(5) | C65-C64   | 1.493(7)  |
| N7-C91  | 1.359(6) | C65-C66   | 1.512(7)  |
| N7-C97  | 1.423(6) | C79-C84   | 1.410(6)  |
| C1-C6   | 1.399(5) | C72-C71   | 1.391(6)  |
| C1-C2   | 1.467(5) | C72-C76   | 1.520(7)  |
| C37-C38 | 1.404(6) | C46-C47   | 1.529(6)  |
| C37-C42 | 1.414(6) | C46-C48   | 1.533(7)  |
| N8-C92  | 1.330(5) | C84-C83   | 1.394(7)  |
| N8-C109 | 1.446(5) | C84-C85   | 1.524(7)  |
| C19-C24 | 1.406(5) | C81-C82   | 1.375(7)  |
| C19-C20 | 1.408(5) | C92-C93   | 1.425(7)  |
| C2-C3   | 1.456(6) | C92-C91   | 1.460(6)  |
| C61-C66 | 1.459(6) | C69-C70   | 1.377(7)  |
| C61-C62 | 1.464(5) | C43-C44   | 1.513(7)  |
| C32-C33 | 1.445(5) | C43-C45   | 1.536(6)  |
| C32-C31 | 1.457(5) | C91-C96   | 1.416(7)  |
| C31-C36 | 1.424(5) | C40-C41   | 1.383(7)  |
| C24-C23 | 1.406(6) | C64-C63   | 1.473(7)  |
| C24-C25 | 1.524(5) | C36-C35   | 1.453(8)  |
| C50-C51 | 1.389(6) | C36-C35A  | 1.536(19) |
| C50-C58 | 1.528(6) | C111-C112 | 1.382(9)  |
| C38-C39 | 1.400(6) | C103-C105 | 1.507(7)  |
| C38-C46 | 1.516(6) | C103-C104 | 1.550(8)  |
| C55-C56 | 1.519(6) | C114-C113 | 1.401(8)  |
| C55-C54 | 1.526(6) | C114-C115 | 1.512(9)  |
| C55-C57 | 1.530(6) | C82-C83   | 1.374(8)  |
| C54-C53 | 1.387(6) | C85-C87   | 1.512(8)  |
| C20-C21 | 1.392(6) | C85-C86   | 1.525(8)  |
| C20-C28 | 1.527(6) | C13-C14   | 1.524(7)  |
| C67-C68 | 1.403(6) | C13-C15   | 1.527(8)  |
| C67-C72 | 1.403(6) | C93-C94   | 1.445(8)  |
| C23-C22 | 1.382(6) | C34-C35A  | 1.435(19) |
| C7-C12  | 1.402(6) | C34-C35   | 1.475(11) |
| C7-C8   | 1.402(6) | C76-C77   | 1.505(14) |
| C25-C27 | 1.523(5) | C76-C78A  | 1.506(13) |
| C25-C26 | 1.528(6) | C76-C77A  | 1.526(14) |
| C62-C63 | 1.390(6) | C76-C78   | 1.572(13) |
| C33-C34 | 1.473(6) | C71-C70   | 1.380(8)  |
| C88-C80 | 1.509(6) | C96-C95   | 1.441(8)  |

---

|            |            |                |           |
|------------|------------|----------------|-----------|
| C88-C89    | 1.527(7)   | C98-C99        | 1.382(9)  |
| C88-C90    | 1.528(7)   | C98-C106       | 1.502(9)  |
| C42-C41    | 1.392(6)   | C113-C112      | 1.373(10) |
| C42-C43    | 1.518(7)   | C3-C4          | 1.483(7)  |
| C12-C11    | 1.404(6)   | C101-C100      | 1.398(9)  |
| C12-C16    | 1.510(6)   | C99-C100       | 1.362(10) |
| C28-C29    | 1.514(7)   | C4-C5          | 1.457(8)  |
| C28-C30    | 1.545(6)   | C106-C108      | 1.522(10) |
| C21-C22    | 1.375(6)   | C106-C107      | 1.536(10) |
| C68-C69    | 1.402(6)   | C115-C117      | 1.523(9)  |
| C68-C73    | 1.516(6)   | C115-C116      | 1.541(9)  |
| C97-C98    | 1.412(6)   | C94-C95        | 1.442(9)  |
| O1-Ge1-N1  | 100.15(13) | C60-C58-C50    | 111.8(4)  |
| O1-Ge1-N2  | 93.85(12)  | C60-C58-C59    | 110.9(4)  |
| N1-Ge1-N2  | 78.71(12)  | C50-C58-C59    | 112.5(4)  |
| O1-Ge2-N4  | 94.40(13)  | C68-C73-C74    | 112.8(4)  |
| O1-Ge2-N3  | 100.48(13) | C68-C73-C75    | 108.9(4)  |
| N4-Ge2-N3  | 78.42(12)  | C74-C73-C75    | 110.9(4)  |
| O2-Ge3-N6  | 99.97(14)  | C1-C6-C5       | 121.9(4)  |
| O2-Ge3-N5  | 94.53(13)  | C110-C118-C120 | 112.3(4)  |
| N6-Ge3-N5  | 78.52(13)  | C110-C118-C119 | 110.4(4)  |
| O2-Ge4-N7  | 99.73(14)  | C120-C118-C119 | 110.1(5)  |
| O2-Ge4-N8  | 94.99(14)  | C7-C8-C9       | 118.3(4)  |
| N7-Ge4-N8  | 78.82(14)  | C7-C8-C13      | 122.4(4)  |
| Ge2-O1-Ge1 | 120.94(16) | C9-C8-C13      | 119.3(4)  |
| Ge4-O2-Ge3 | 119.60(17) | C10-C9-C8      | 121.6(4)  |
| C1-N1-C7   | 119.5(3)   | C54-C53-C52    | 122.0(4)  |
| C1-N1-Ge1  | 116.5(3)   | C101-C102-C97  | 117.1(5)  |
| C7-N1-Ge1  | 121.1(2)   | C101-C102-C103 | 120.7(5)  |
| C61-N5-C67 | 123.4(3)   | C97-C102-C103  | 122.1(4)  |
| C61-N5-Ge3 | 115.9(2)   | C81-C80-C79    | 117.5(4)  |
| C67-N5-Ge3 | 120.5(2)   | C81-C80-C88    | 120.7(4)  |
| C31-N3-C37 | 118.8(3)   | C79-C80-C88    | 121.7(4)  |
| C31-N3-Ge2 | 115.5(2)   | C10-C11-C12    | 121.2(4)  |
| C37-N3-Ge2 | 122.3(3)   | C110-C109-C114 | 121.3(4)  |
| C2-N2-C19  | 121.6(3)   | C110-C109-N8   | 120.1(4)  |
| C2-N2-Ge1  | 115.8(2)   | C114-C109-N8   | 118.5(5)  |
| C19-N2-Ge1 | 122.2(2)   | C9-C10-C11     | 119.9(4)  |
| C32-N4-C49 | 120.6(3)   | C12-C16-C18    | 113.3(4)  |
| C32-N4-Ge2 | 116.4(3)   | C12-C16-C17    | 111.8(4)  |
| C49-N4-Ge2 | 122.0(2)   | C18-C16-C17    | 110.0(4)  |

---

|             |          |                |           |
|-------------|----------|----------------|-----------|
| C54-C49-C50 | 121.4(4) | C52-C51-C50    | 120.6(4)  |
| C54-C49-N4  | 120.3(3) | C111-C110-C109 | 118.3(5)  |
| C50-C49-N4  | 118.3(4) | C111-C110-C118 | 119.7(5)  |
| C62-N6-C79  | 116.1(3) | C109-C110-C118 | 121.9(4)  |
| C62-N6-Ge3  | 116.3(2) | C64-C65-C66    | 112.5(4)  |
| C79-N6-Ge3  | 125.3(3) | C80-C79-C84    | 121.5(4)  |
| C91-N7-C97  | 121.0(4) | C80-C79-N6     | 119.9(4)  |
| C91-N7-Ge4  | 115.8(3) | C84-C79-N6     | 118.5(4)  |
| C97-N7-Ge4  | 121.0(3) | C21-C22-C23    | 120.0(4)  |
| N1-C1-C6    | 126.8(4) | C71-C72-C67    | 118.4(4)  |
| N1-C1-C2    | 114.0(3) | C71-C72-C76    | 120.1(4)  |
| C6-C1-C2    | 118.8(4) | C67-C72-C76    | 121.5(4)  |
| C38-C37-C42 | 121.3(4) | C38-C46-C47    | 112.6(4)  |
| C38-C37-N3  | 119.9(4) | C38-C46-C48    | 110.2(4)  |
| C42-C37-N3  | 118.9(4) | C47-C46-C48    | 110.4(4)  |
| C92-N8-C109 | 120.6(4) | C83-C84-C79    | 117.7(4)  |
| C92-N8-Ge4  | 116.2(3) | C83-C84-C85    | 121.1(4)  |
| C109-N8-Ge4 | 122.4(3) | C79-C84-C85    | 121.1(4)  |
| C24-C19-C20 | 121.4(4) | C82-C81-C80    | 121.7(4)  |
| C24-C19-N2  | 119.7(3) | N8-C92-C93     | 126.1(4)  |
| C20-C19-N2  | 118.8(3) | N8-C92-C91     | 115.0(4)  |
| N2-C2-C3    | 125.5(4) | C93-C92-C91    | 118.8(4)  |
| N2-C2-C1    | 114.8(3) | C51-C52-C53    | 119.7(4)  |
| C3-C2-C1    | 119.4(3) | C70-C69-C68    | 121.7(5)  |
| N5-C61-C66  | 125.9(4) | C44-C43-C42    | 111.8(4)  |
| N5-C61-C62  | 115.3(3) | C44-C43-C45    | 110.8(4)  |
| C66-C61-C62 | 118.7(3) | C42-C43-C45    | 111.7(4)  |
| N4-C32-C33  | 125.4(4) | N7-C91-C96     | 126.1(4)  |
| N4-C32-C31  | 115.0(3) | N7-C91-C92     | 114.2(4)  |
| C33-C32-C31 | 119.6(3) | C96-C91-C92    | 119.6(4)  |
| N3-C31-C36  | 125.9(4) | C39-C40-C41    | 120.4(4)  |
| N3-C31-C32  | 114.7(3) | C40-C41-C42    | 120.9(4)  |
| C36-C31-C32 | 119.3(3) | C63-C64-C65    | 111.8(4)  |
| C19-C24-C23 | 117.5(4) | C31-C36-C35    | 120.0(4)  |
| C19-C24-C25 | 122.4(3) | C31-C36-C35A   | 114.5(10) |
| C23-C24-C25 | 120.0(3) | C112-C111-C110 | 120.4(6)  |
| C51-C50-C49 | 118.9(4) | C102-C103-C105 | 113.5(5)  |
| C51-C50-C58 | 119.4(4) | C102-C103-C104 | 110.7(4)  |
| C49-C50-C58 | 121.7(4) | C105-C103-C104 | 109.0(4)  |
| C39-C38-C37 | 117.8(4) | C113-C114-C109 | 117.8(6)  |
| C39-C38-C46 | 119.5(4) | C113-C114-C115 | 119.6(5)  |

---

---

|              |          |                |          |
|--------------|----------|----------------|----------|
| C37-C38-C46  | 122.6(4) | C109-C114-C115 | 122.6(5) |
| C56-C55-C54  | 112.0(3) | C61-C66-C65    | 116.0(4) |
| C56-C55-C57  | 110.4(4) | C83-C82-C81    | 120.0(4) |
| C54-C55-C57  | 110.7(3) | C87-C85-C84    | 113.0(5) |
| C53-C54-C49  | 117.4(4) | C87-C85-C86    | 110.8(5) |
| C53-C54-C55  | 120.0(4) | C84-C85-C86    | 110.8(5) |
| C49-C54-C55  | 122.6(3) | C8-C13-C14     | 112.2(4) |
| C21-C20-C19  | 118.4(4) | C8-C13-C15     | 111.7(5) |
| C21-C20-C28  | 119.8(4) | C14-C13-C15    | 110.7(5) |
| C19-C20-C28  | 121.8(4) | C92-C93-C94    | 119.9(5) |
| C68-C67-C72  | 121.1(4) | C35A-C34-C33   | 120.0(9) |
| C68-C67-N5   | 120.2(4) | C33-C34-C35    | 113.4(5) |
| C72-C67-N5   | 118.7(4) | C62-C63-C64    | 121.6(4) |
| C22-C23-C24  | 121.4(4) | C77-C76-C72    | 110.0(8) |
| C12-C7-C8    | 120.7(4) | C78A-C76       | -C72     |
| C12-C7-N1    | 120.6(3) | C78A-C76       | -C77A    |
| C8-C7-N1     | 118.7(4) | C72-C76-C77A   | 112.2(9) |
| C27-C25-C24  | 112.5(4) | C77-C76-C78    | 108.7(9) |
| C27-C25-C26  | 110.4(4) | C72-C76-C78    | 111.2(7) |
| C24-C25-C26  | 110.4(3) | C70-C71-C72    | 121.5(4) |
| N6-C62-C63   | 126.1(4) | C91-C96-C95    | 121.0(5) |
| N6-C62-C61   | 113.7(3) | C82-C83-C84    | 121.4(5) |
| C63-C62-C61  | 120.1(4) | C99-C98-C97    | 119.1(6) |
| C32-C33-C34  | 117.4(4) | C99-C98-C106   | 118.5(5) |
| C80-C88-C89  | 111.5(4) | C97-C98-C106   | 122.4(5) |
| C80-C88-C90  | 112.1(4) | C112-C113-C114 | 121.0(5) |
| C89-C88-C90  | 110.0(4) | C2-C3-C4       | 116.5(4) |
| C41-C42-C37  | 118.1(4) | C69-C70-C71    | 119.4(4) |
| C41-C42-C43  | 119.5(4) | C113-C112-C111 | 121.0(5) |
| C37-C42-C43  | 122.4(4) | C102-C101-C100 | 121.0(6) |
| C7-C12-C11   | 118.4(4) | C100-C99-C98   | 120.5(6) |
| C7-C12-C16   | 122.0(4) | C5-C4-C3       | 115.2(5) |
| C11-C12-C16  | 119.6(4) | C98-C106-C108  | 112.4(7) |
| C29-C28-C20  | 112.7(4) | C98-C106-C107  | 110.9(6) |
| C29-C28-C30  | 109.6(4) | C108-C106-C107 | 111.4(5) |
| C20-C28-C30  | 111.1(4) | C114-C115-C117 | 113.7(6) |
| C22-C21-C20  | 121.3(4) | C114-C115-C116 | 112.4(6) |
| C69-C68-C67  | 117.9(4) | C117-C115-C116 | 110.0(6) |
| C69-C68-C73  | 119.3(4) | C95-C94-C93    | 118.0(6) |
| C67-C68-C73  | 122.7(3) | C4-C5-C6       | 117.0(4) |
| C98-C97-C102 | 121.2(4) | C96-C95-C94    | 118.8(5) |

---

|             |          |               |           |
|-------------|----------|---------------|-----------|
| C98-C97-N7  | 118.5(4) | C36-C35-C34   | 116.0(6)  |
| C102-C97-N7 | 120.3(4) | C99-C100-C101 | 121.0(6)  |
| C40-C39-C38 | 121.4(4) | C34-C35A-C36  | 113.4(14) |

### Crystallographic data for compound 7a

|                                             |                                                                  |
|---------------------------------------------|------------------------------------------------------------------|
| Identification code                         | Compound 7a                                                      |
| Empirical formula                           | C <sub>66</sub> H <sub>96</sub> Ge <sub>2</sub> N <sub>4</sub> O |
| Formula weight                              | 1106.64                                                          |
| Temperature/K                               | 153.0                                                            |
| Crystal system                              | triclinic                                                        |
| Space group                                 | P-1                                                              |
| a/Å                                         | 12.930(5)                                                        |
| b/Å                                         | 15.925(8)                                                        |
| c/Å                                         | 17.049(8)                                                        |
| α/°                                         | 73.279(18)                                                       |
| β/°                                         | 85.825(19)                                                       |
| γ/°                                         | 71.002(18)                                                       |
| Volume/Å <sup>3</sup>                       | 3178(3)                                                          |
| Z                                           | 2                                                                |
| ρ <sub>calc</sub> /cm <sup>3</sup>          | 1.156                                                            |
| μ/mm <sup>-1</sup>                          | 0.997                                                            |
| F(000)                                      | 1184.0                                                           |
| Crystal size/mm <sup>3</sup>                | 0.2 × 0.18 × 0.15                                                |
| Radiation                                   | GaKα (λ = 1.34138)                                               |
| 2θ range for data collection/°              | 4.71 to 107.88                                                   |
| Index ranges                                | -15 ≤ h ≤ 15, -19 ≤ k ≤ 19, -20 ≤ l ≤ 20                         |
| Reflections collected                       | 62124                                                            |
| Independent reflections                     | 11632 [R <sub>int</sub> = 0.0687, R <sub>sigma</sub> = 0.0487]   |
| Data/restraints/parameters                  | 11632/2/676                                                      |
| Goodness-of-fit on F <sup>2</sup>           | 1.032                                                            |
| Final R indexes [I ≥ 2σ (I)]                | R <sub>1</sub> = 0.0448, wR <sub>2</sub> = 0.1070                |
| Final R indexes [all data]                  | R <sub>1</sub> = 0.0698, wR <sub>2</sub> = 0.1187                |
| Largest diff. peak/hole / e Å <sup>-3</sup> | 0.56/-0.56                                                       |

**Table S8.** Bond lengths [Å] and angles [°] for compound 7a

|        |            |         |          |
|--------|------------|---------|----------|
| Ge2-O1 | 1.8143(19) | C55-C56 | 1.523(4) |
| Ge2-N4 | 1.984(2)   | C55-C57 | 1.535(4) |
| Ge2-N3 | 2.076(2)   | C33-C34 | 1.482(4) |
| Ge1-O1 | 1.807(2)   | C53-C52 | 1.371(4) |
| Ge1-N1 | 2.090(2)   | C12-C13 | 1.509(5) |

|           |           |             |           |
|-----------|-----------|-------------|-----------|
| Ge1-N2    | 1.981(2)  | C12-C11     | 1.405(4)  |
| N4-C32    | 1.372(3)  | C8-C9       | 1.407(5)  |
| N4-C49    | 1.437(3)  | C8-C16      | 1.505(6)  |
| N3-C31    | 1.310(3)  | C36-C35     | 1.510(4)  |
| N3-C37    | 1.438(3)  | C3-C4       | 1.503(4)  |
| N1-C1     | 1.305(3)  | C42-C43     | 1.518(5)  |
| N1-C7     | 1.453(3)  | C42-C41     | 1.392(4)  |
| N2-C2     | 1.369(3)  | C58-C60     | 1.524(5)  |
| N2-C19    | 1.437(4)  | C58-C59     | 1.528(4)  |
| C32-C31   | 1.466(3)  | C51-C52     | 1.378(5)  |
| C32-C33   | 1.370(4)  | C6-C5       | 1.493(4)  |
| C1-C2     | 1.468(4)  | C23-C22     | 1.378(5)  |
| C1-C6     | 1.478(3)  | C34-C35     | 1.487(5)  |
| C49-C54   | 1.403(4)  | C5-C4       | 1.505(4)  |
| C49-C50   | 1.415(4)  | C22-C21     | 1.378(5)  |
| C2-C3     | 1.373(4)  | C43-C44     | 1.519(5)  |
| C31-C36   | 1.469(4)  | C43-C45     | 1.509(6)  |
| C54-C55   | 1.522(4)  | C39-C40     | 1.375(5)  |
| C54-C53   | 1.401(4)  | C20-C21     | 1.395(5)  |
| C7-C12    | 1.389(4)  | C20-C28     | 1.524(5)  |
| C7-C8     | 1.394(4)  | C13-C15     | 1.515(5)  |
| C46-C38   | 1.512(4)  | C13-C14     | 1.533(5)  |
| C46-C47   | 1.533(4)  | C11-C10     | 1.359(6)  |
| C46-C48   | 1.534(4)  | C41-C40     | 1.377(5)  |
| C50-C58   | 1.524(4)  | C9-C10      | 1.370(6)  |
| C50-C51   | 1.393(4)  | C16-C17     | 1.537(6)  |
| C24-C19   | 1.400(4)  | C16-C18     | 1.549(6)  |
| C24-C25   | 1.516(4)  | C28-C29     | 1.494(7)  |
| C24-C23   | 1.392(4)  | C28-C30     | 1.509(7)  |
| C37-C38   | 1.404(4)  | C66-C65     | 1.589(15) |
| C37-C42   | 1.411(4)  | C61-C62     | 1.503(11) |
| C38-C39   | 1.396(4)  | C63-C64     | 1.507(12) |
| C19-C20   | 1.408(4)  | C63-C62     | 1.397(11) |
| C25-C27   | 1.527(4)  | C64-C65     | 1.447(9)  |
| C25-C26   | 1.529(4)  | C20-C19-N2  | 118.8(3)  |
| O1-Ge2-N4 | 101.38(9) | C24-C25-C27 | 112.7(2)  |
| O1-Ge2-N3 | 92.74(9)  | C24-C25-C26 | 110.3(3)  |
| N4-Ge2-N3 | 78.73(9)  | C27-C25-C26 | 109.6(3)  |
| O1-Ge1-N1 | 98.00(9)  | C54-C55-C56 | 113.6(2)  |
| O1-Ge1-N2 | 96.87(10) | C54-C55-C57 | 110.5(2)  |
| N2-Ge1-N1 | 78.42(9)  | C56-C55-C57 | 109.6(3)  |



|             |            |             |          |
|-------------|------------|-------------|----------|
| Ge1-O1-Ge2  | 121.17(11) | C32-C33-C34 | 123.0(2) |
| C32-N4-Ge2  | 116.91(16) | C52-C53-C54 | 121.4(3) |
| C32-N4-C49  | 119.27(19) | C7-C12-C13  | 122.8(3) |
| C49-N4-Ge2  | 119.54(16) | C7-C12-C11  | 117.6(3) |
| C31-N3-Ge2  | 115.40(17) | C11-C12-C13 | 119.6(3) |
| C31-N3-C37  | 122.0(2)   | C7-C8-C9    | 117.6(4) |
| C37-N3-Ge2  | 122.52(17) | C7-C8-C16   | 122.5(3) |
| C1-N1-Ge1   | 114.86(18) | C9-C8-C16   | 119.9(3) |
| C1-N1-C7    | 120.6(2)   | C31-C36-C35 | 114.0(2) |
| C7-N1-Ge1   | 123.49(16) | C2-C3-C4    | 121.8(3) |
| C2-N2-Ge1   | 117.77(19) | C37-C42-C43 | 122.0(3) |
| C2-N2-C19   | 119.0(2)   | C41-C42-C37 | 117.4(3) |
| C19-N2-Ge1  | 121.61(17) | C41-C42-C43 | 120.6(3) |
| N4-C32-C31  | 113.8(2)   | C50-C58-C60 | 112.7(3) |
| C33-C32-N4  | 127.3(2)   | C50-C58-C59 | 110.8(3) |
| C33-C32-C31 | 118.9(2)   | C60-C58-C59 | 111.6(3) |
| N1-C1-C2    | 116.0(2)   | C52-C51-C50 | 121.2(3) |
| N1-C1-C6    | 125.0(3)   | C53-C52-C51 | 120.2(3) |
| C2-C1-C6    | 118.8(2)   | C1-C6-C5    | 113.5(3) |
| C54-C49-N4  | 120.1(2)   | C22-C23-C24 | 121.3(3) |
| C54-C49-C50 | 120.9(2)   | C33-C34-C35 | 112.9(3) |
| C50-C49-N4  | 118.8(3)   | C6-C5-C4    | 111.1(3) |
| N2-C2-C1    | 112.9(2)   | C21-C22-C23 | 119.7(3) |
| N2-C2-C3    | 127.1(3)   | C42-C43-C44 | 113.4(3) |
| C3-C2-C1    | 119.8(2)   | C45-C43-C42 | 111.0(4) |
| N3-C31-C32  | 115.2(2)   | C45-C43-C44 | 111.3(4) |
| N3-C31-C36  | 125.4(2)   | C3-C4-C5    | 112.2(3) |
| C32-C31-C36 | 119.4(2)   | C40-C39-C38 | 121.6(3) |
| C49-C54-C55 | 121.9(2)   | C19-C20-C28 | 122.3(3) |
| C53-C54-C49 | 118.0(3)   | C21-C20-C19 | 117.9(3) |
| C53-C54-C55 | 120.0(3)   | C21-C20-C28 | 119.8(3) |
| C12-C7-N1   | 119.7(3)   | C12-C13-C15 | 112.1(3) |
| C12-C7-C8   | 121.9(3)   | C12-C13-C14 | 112.0(3) |
| C8-C7-N1    | 118.4(3)   | C15-C13-C14 | 110.7(3) |
| C38-C46-C47 | 111.5(2)   | C10-C11-C12 | 121.8(4) |
| C38-C46-C48 | 111.2(3)   | C40-C41-C42 | 121.8(3) |
| C47-C46-C48 | 110.6(2)   | C10-C9-C8   | 121.4(4) |
| C49-C50-C58 | 122.5(2)   | C39-C40-C41 | 119.8(3) |
| C51-C50-C49 | 118.2(3)   | C34-C35-C36 | 111.7(3) |
| C51-C50-C58 | 119.2(3)   | C8-C16-C17  | 111.6(4) |
| C19-C24-C25 | 121.8(2)   | C8-C16-C18  | 110.9(4) |

|             |          |             |           |
|-------------|----------|-------------|-----------|
| C23-C24-C19 | 118.5(3) | C17-C16-C18 | 110.4(4)  |
| C23-C24-C25 | 119.7(3) | C22-C21-C20 | 121.5(3)  |
| C38-C37-N3  | 120.4(2) | C11-C10-C9  | 119.7(3)  |
| C38-C37-C42 | 121.8(2) | C29-C28-C20 | 113.0(3)  |
| C42-C37-N3  | 117.7(2) | C29-C28-C30 | 110.2(4)  |
| C37-C38-C46 | 123.1(2) | C30-C28-C20 | 111.9(5)  |
| C39-C38-C46 | 119.4(3) | C62-C63-C64 | 110.3(10) |
| C39-C38-C37 | 117.5(3) | C65-C64-C63 | 119.8(12) |
| C24-C19-N2  | 120.1(3) | C63-C62-C61 | 112.9(9)  |
| C24-C19-C20 | 121.1(3) | C64-C65-C66 | 115.7(15) |

### C. NMR spectra of 2-7

#### Compound 2

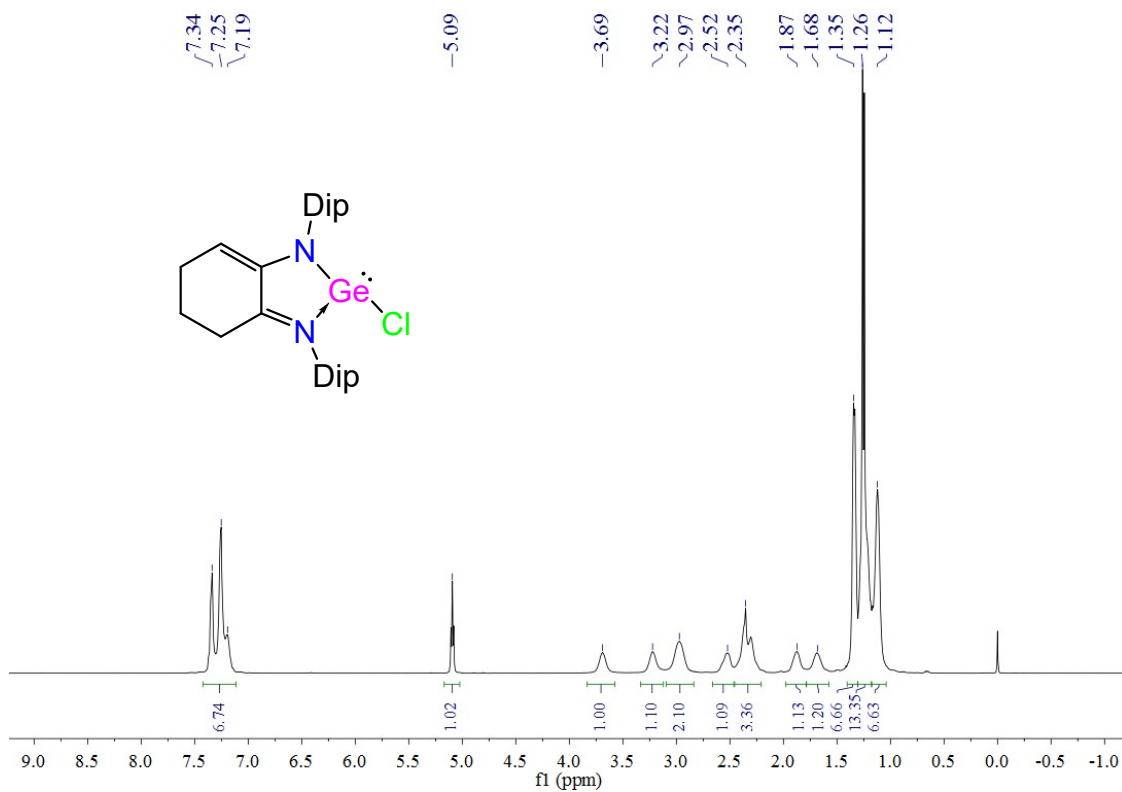

**Figure S3.** <sup>1</sup>H-NMR (400 MHz) spectrum of **2** in CDCl<sub>3</sub>.

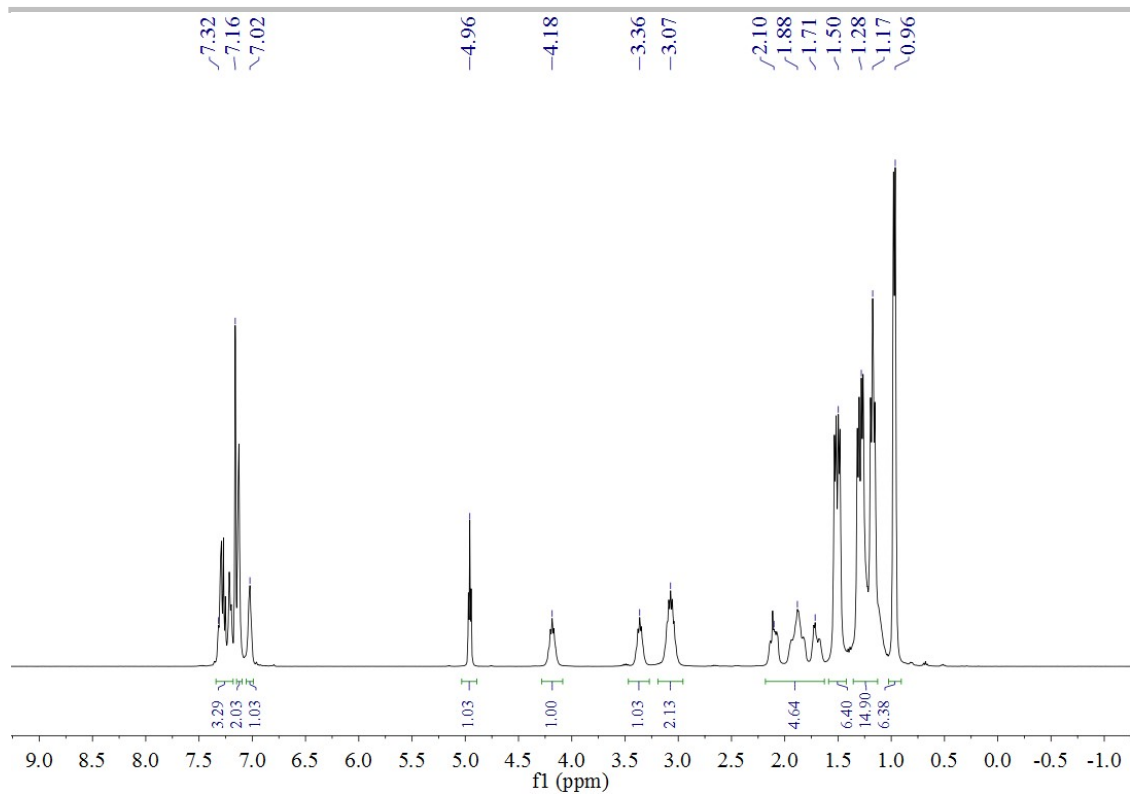

Figure S4.  $^1\text{H}$ -NMR (400 MHz) spectrum of **2** in  $\text{C}_6\text{D}_6$ .

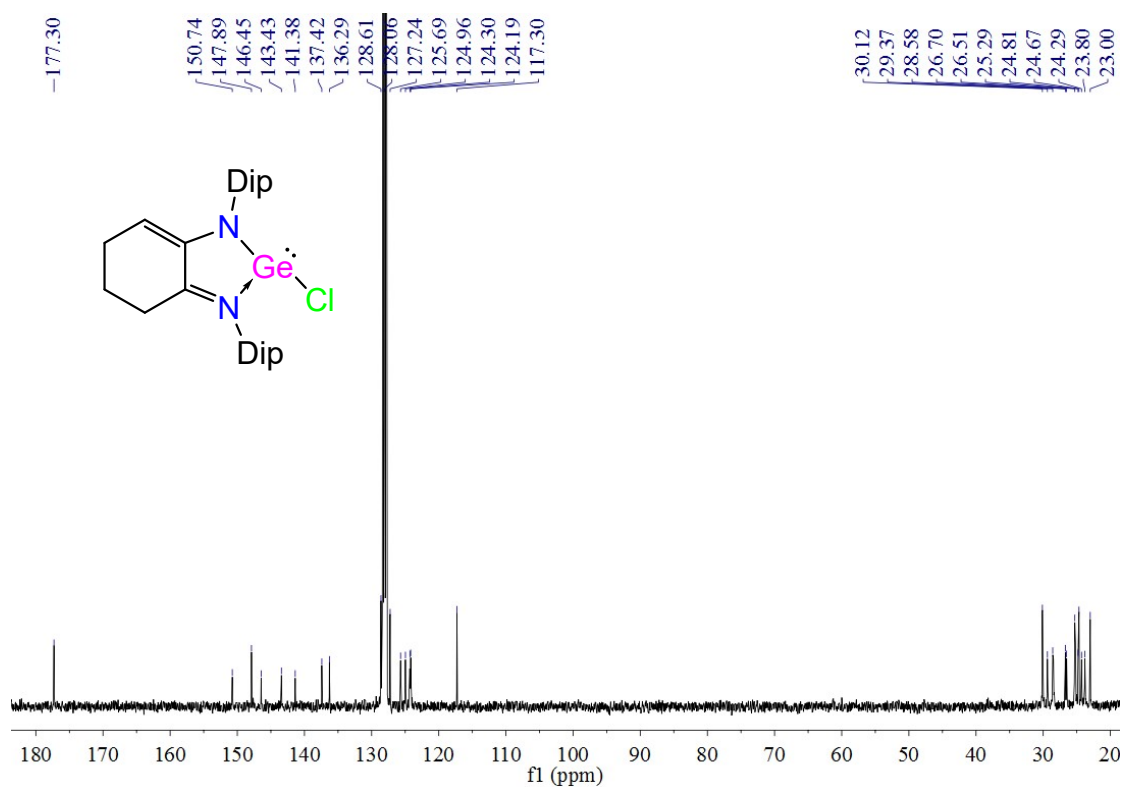

Figure S5.  $^{13}\text{C}$ -NMR (100 MHz) spectrum of **2** in  $\text{C}_6\text{D}_6$ .

### Compound 3

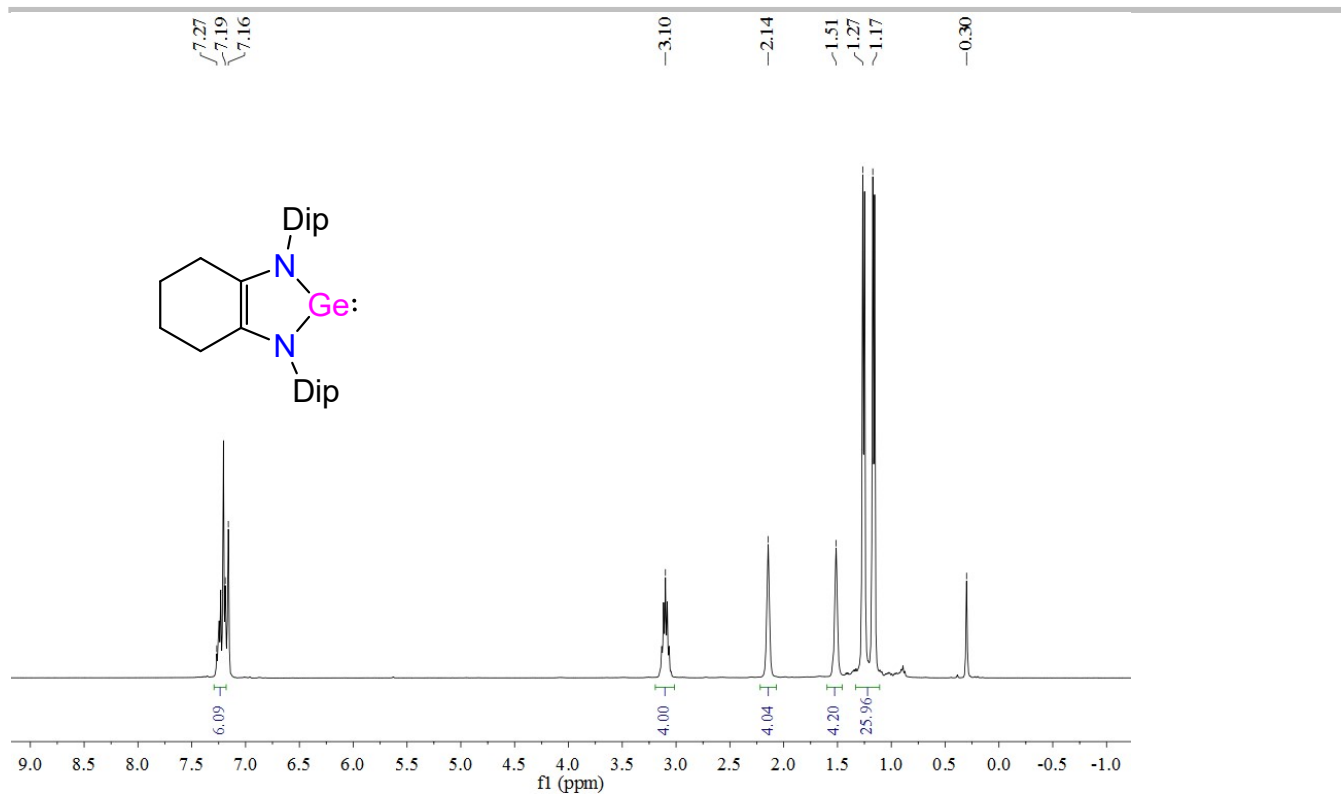

**Figure S6.** <sup>1</sup>H-NMR (400 MHz) spectrum of **3** in C<sub>6</sub>D<sub>6</sub>.

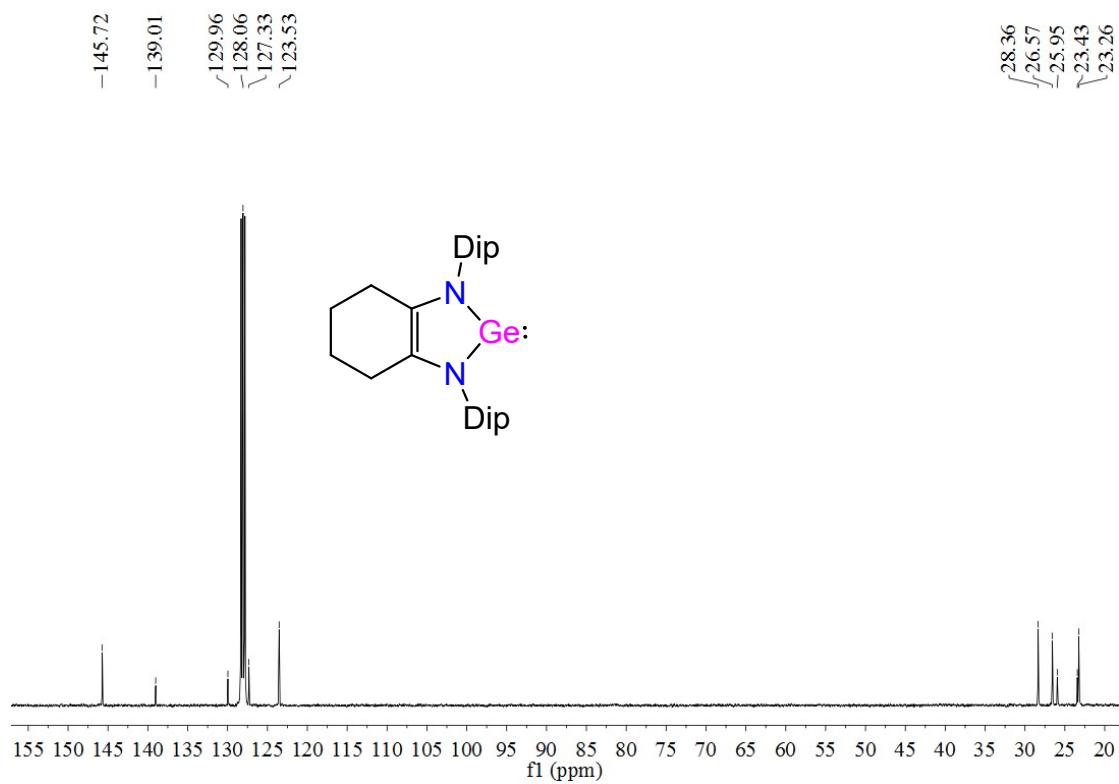

**Figure S7.** <sup>13</sup>C-NMR (100 MHz) spectrum of **3** in C<sub>6</sub>D<sub>6</sub>.

## Compound 4

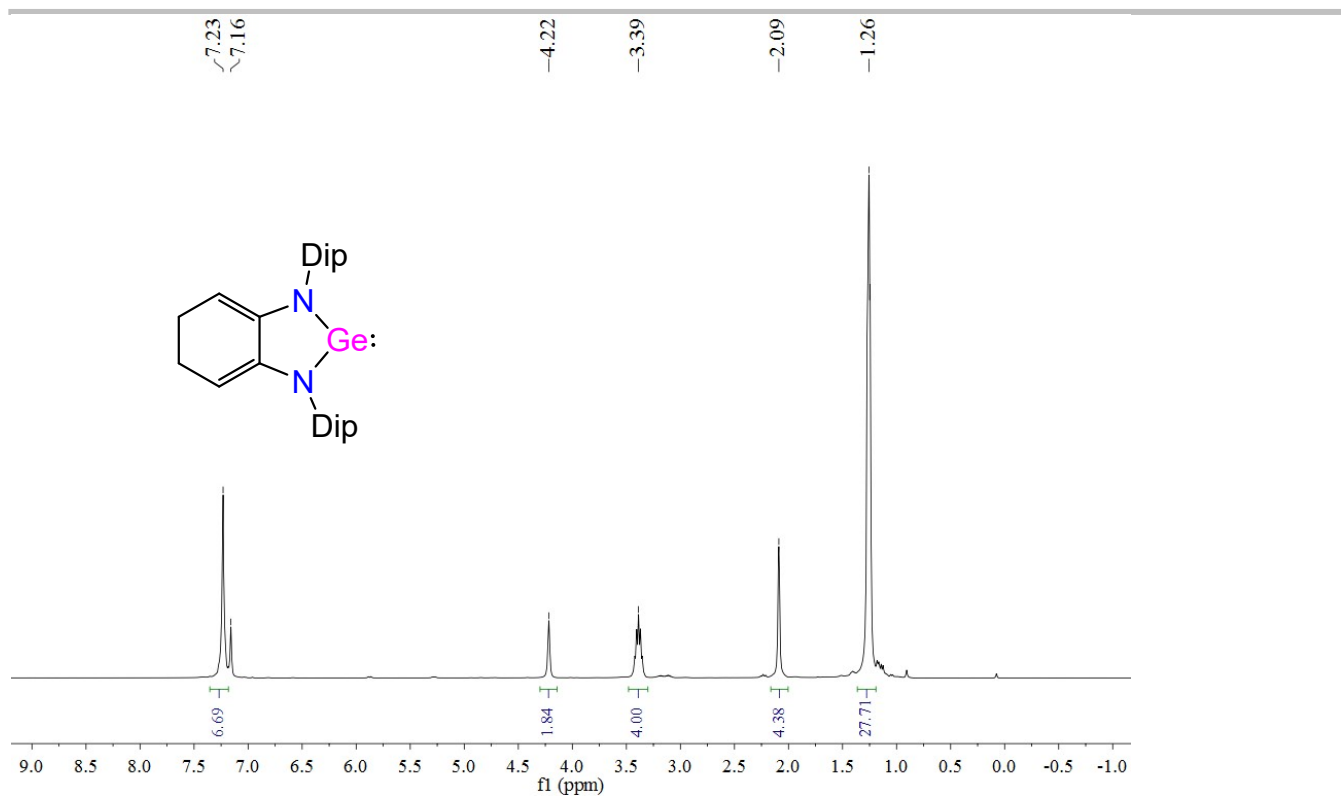

Figure S8. <sup>1</sup>H-NMR (400 MHz) spectrum of 4 in C<sub>6</sub>D<sub>6</sub>.

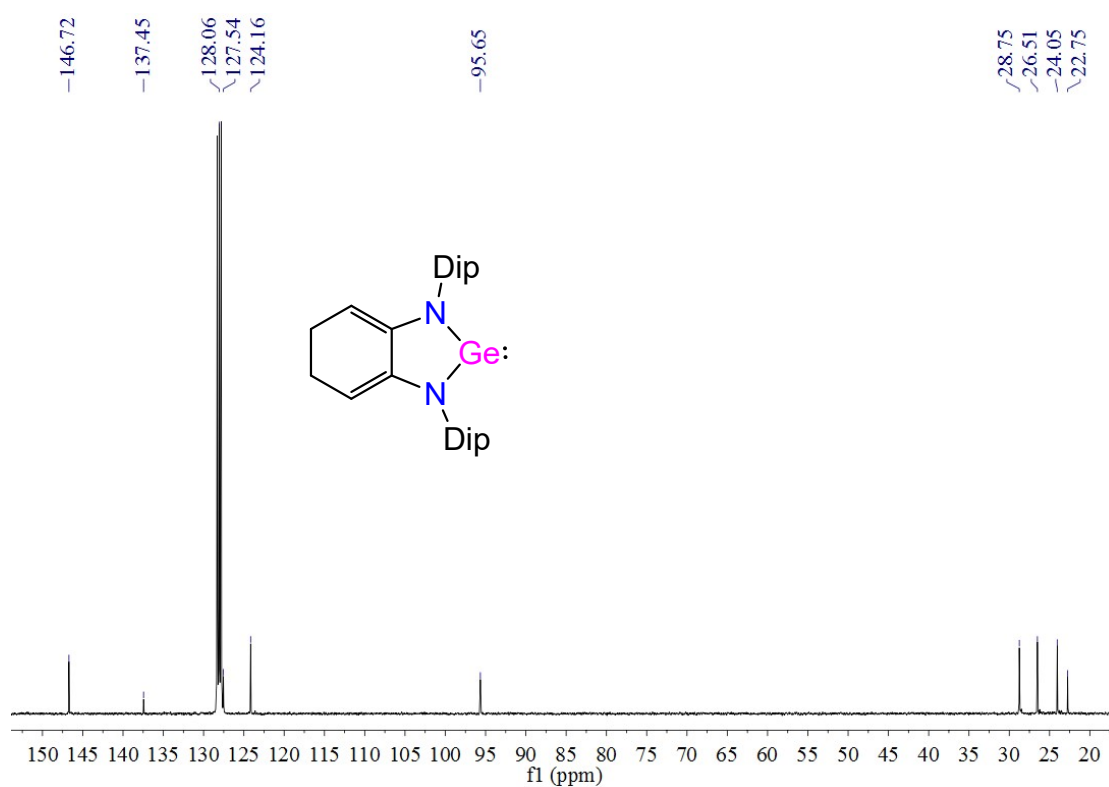

Figure S9. <sup>13</sup>C-NMR (100 MHz) spectrum of 4 in C<sub>6</sub>D<sub>6</sub>.

## Compound 5

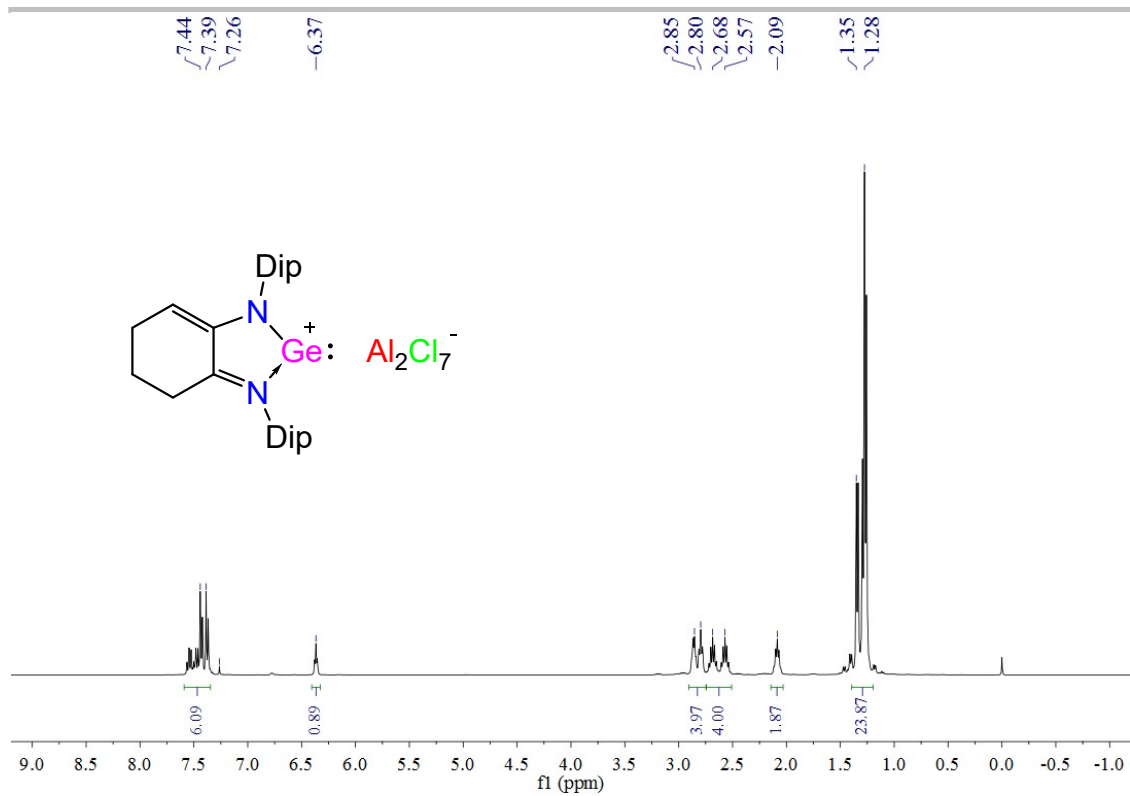

Figure S10.  $^1\text{H-NMR}$  (400 MHz) spectrum of **5** in  $\text{CDCl}_3$ .

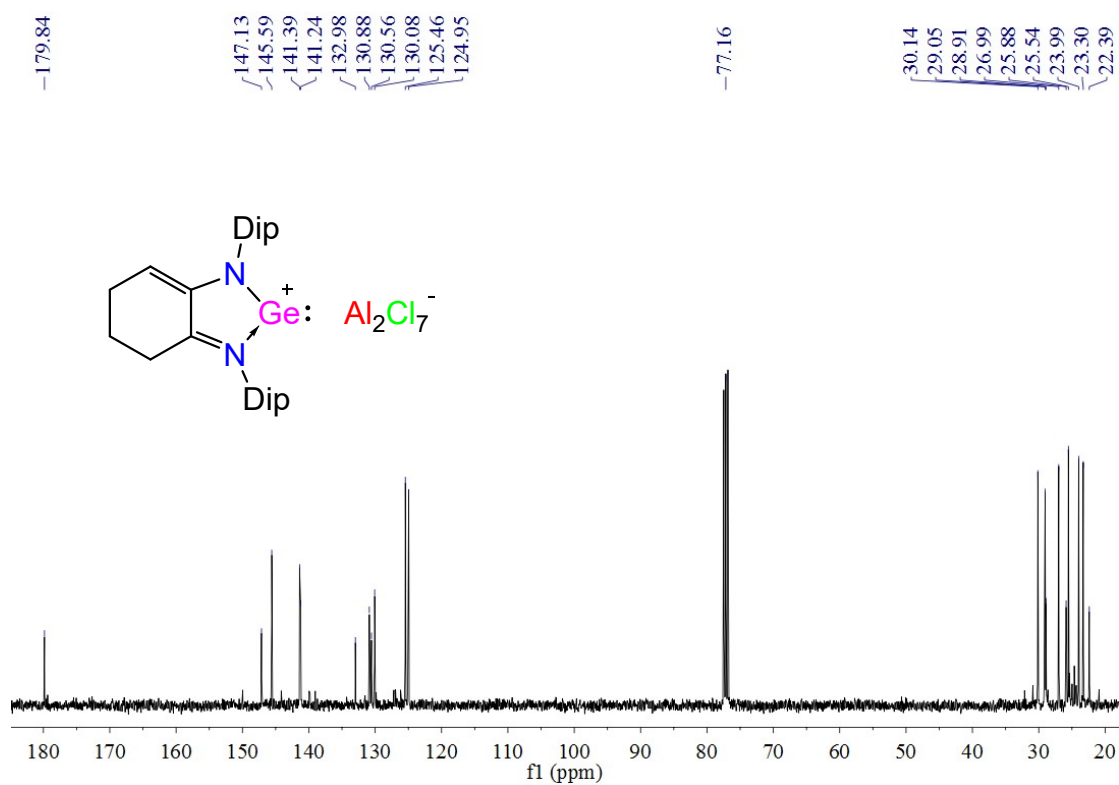

Figure S11.  $^{13}\text{C-NMR}$  (100 MHz) spectrum of **5** in  $\text{CDCl}_3$ .

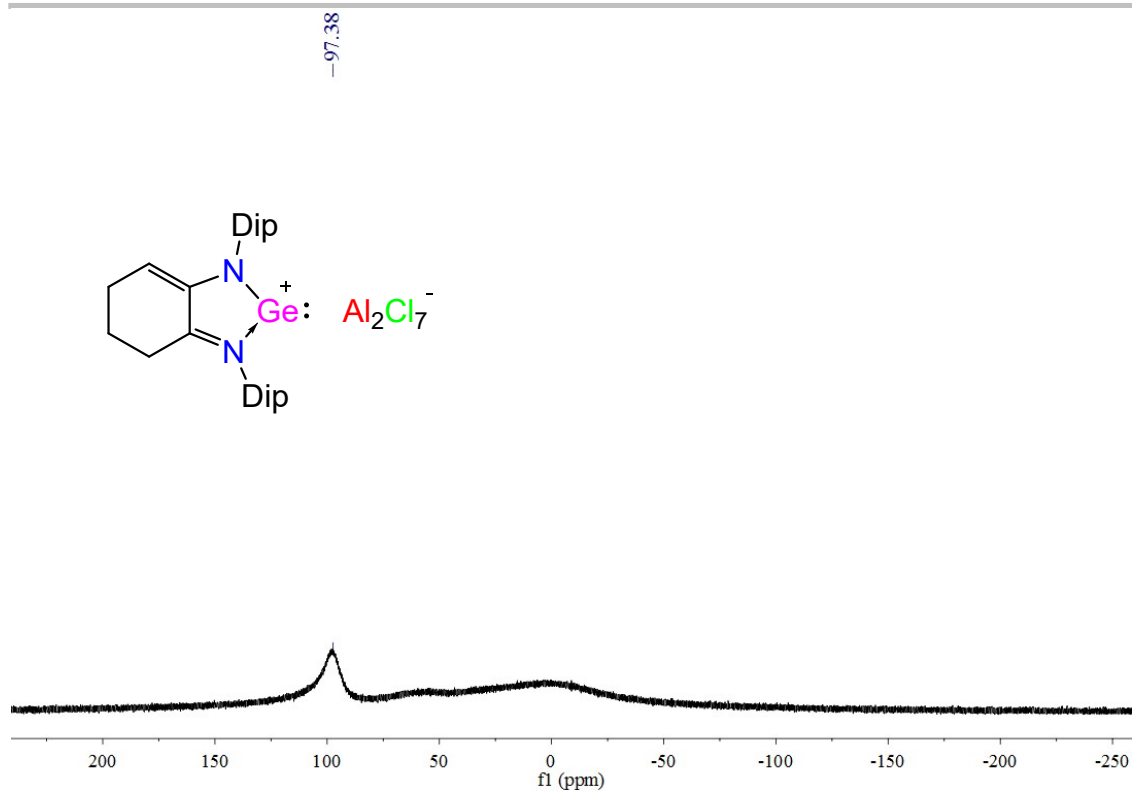

Figure S12.  $^{27}\text{Al}$ -NMR (600 MHz) spectrum of **5** in  $\text{CDCl}_3$ .

### Compound 6

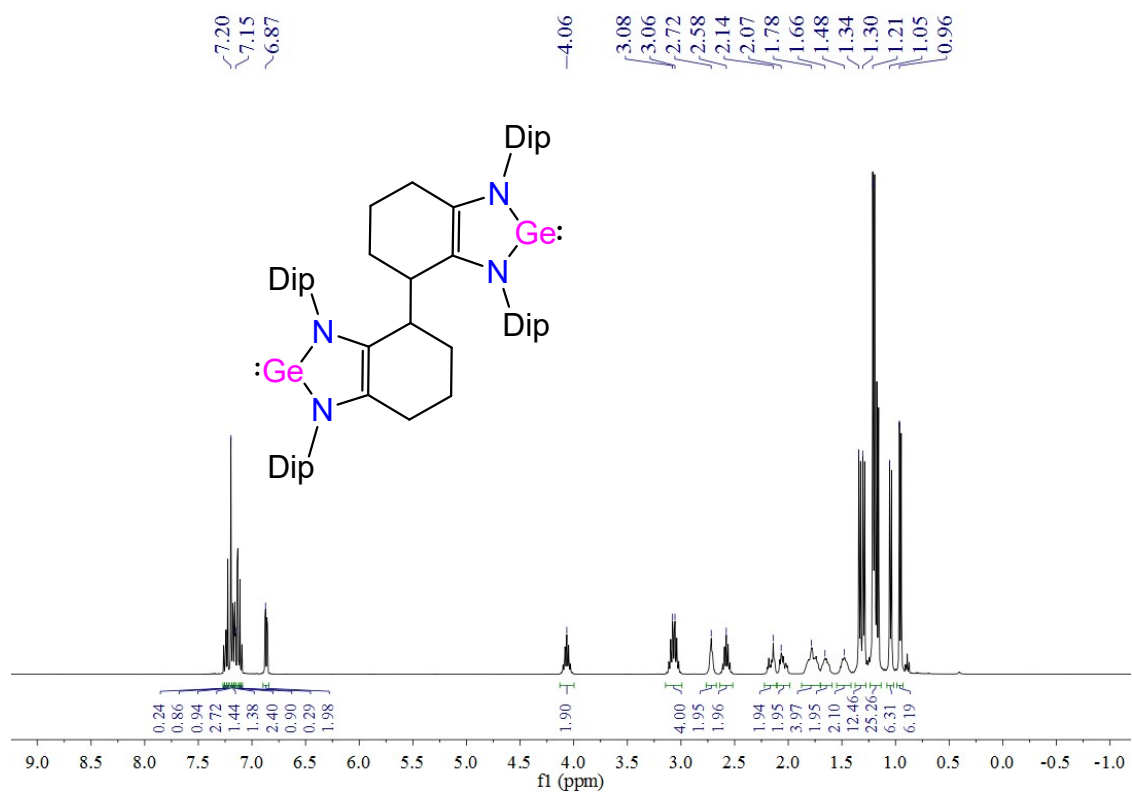

Figure S13.  $^1\text{H}$ -NMR (400 MHz) spectrum of **6** in  $\text{C}_6\text{D}_6$ .

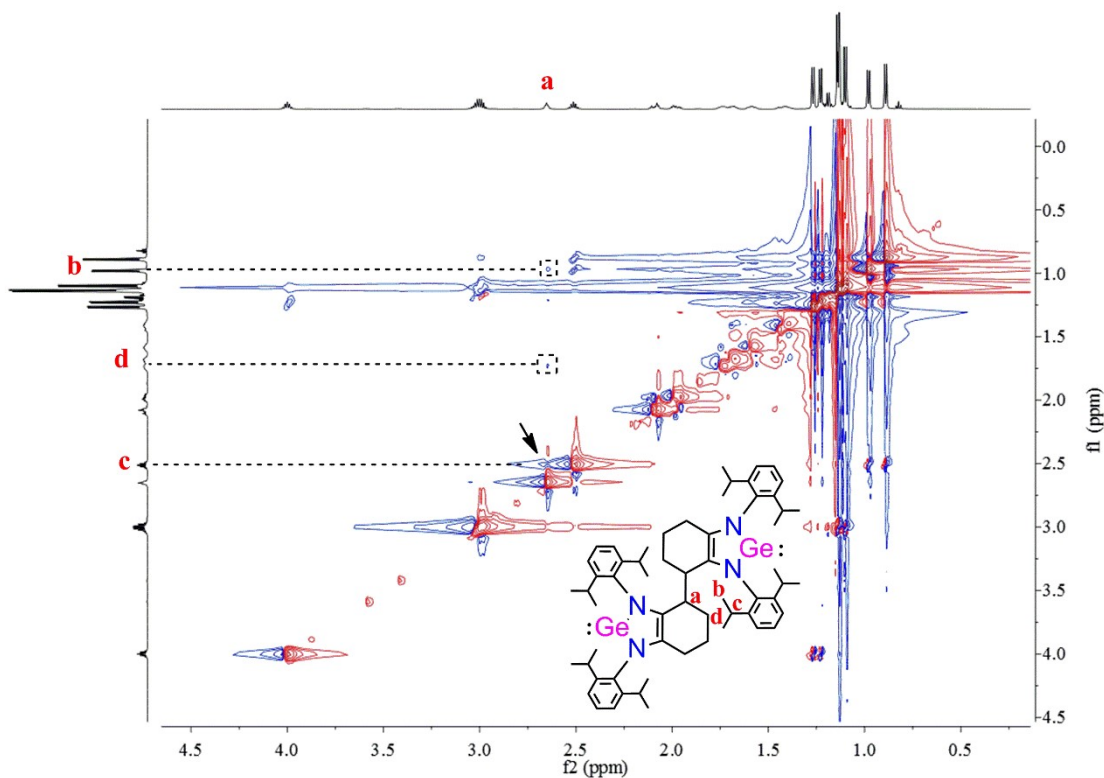

Figure S14.  $^1\text{H}$ - $^1\text{H}$  NOESY NMR (600 MHz) spectrum of **6** in  $\text{C}_6\text{D}_6$ .

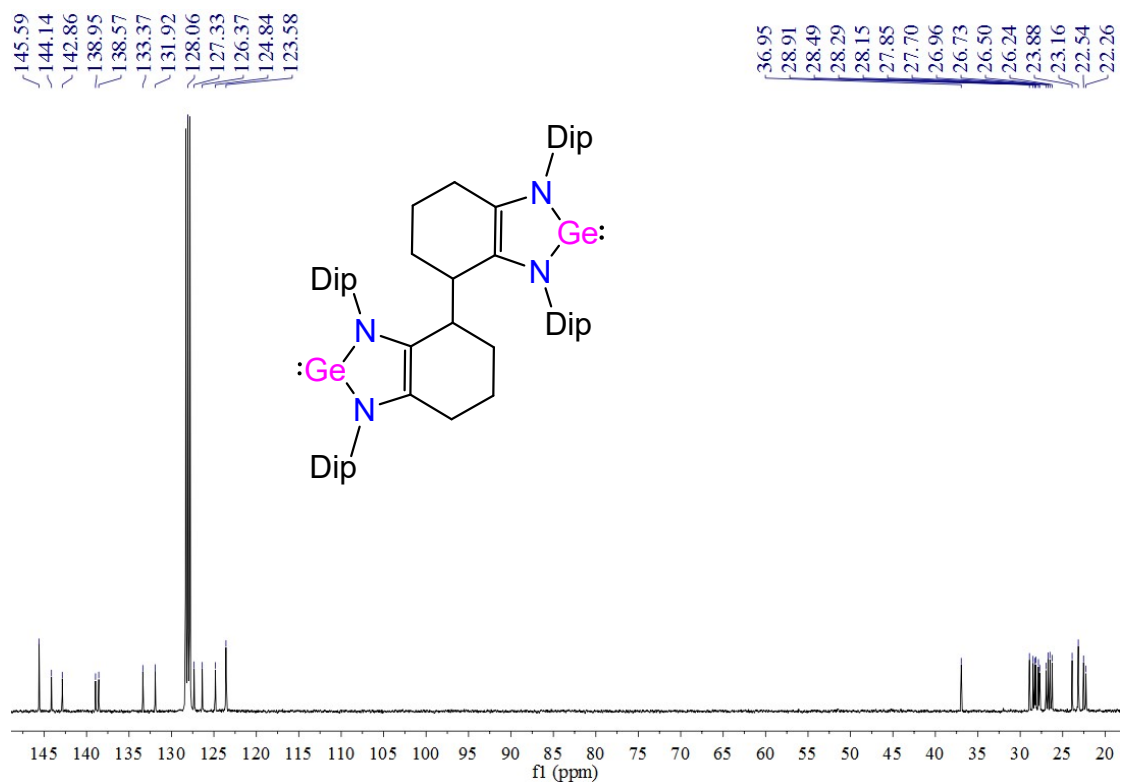

Figure S15.  $^{13}\text{C}$ -NMR (100 MHz) spectrum of **6** in  $\text{C}_6\text{D}_6$ .

### Compound 7



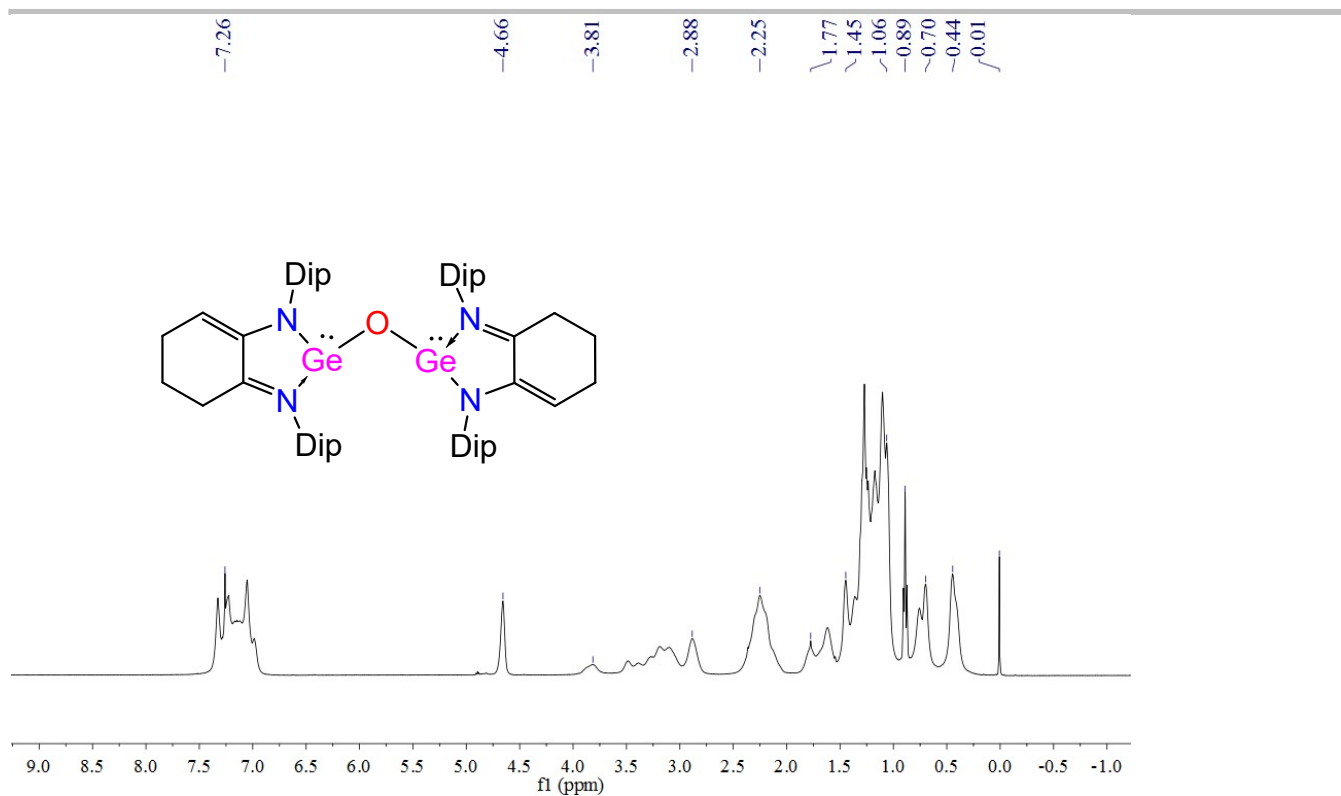

**Figure S16.**  $^1\text{H-NMR}$  (400 MHz) spectrum of the mixture of conformational and *cis-trans* isomers of **7** in  $\text{CDCl}_3$  at 298 K.

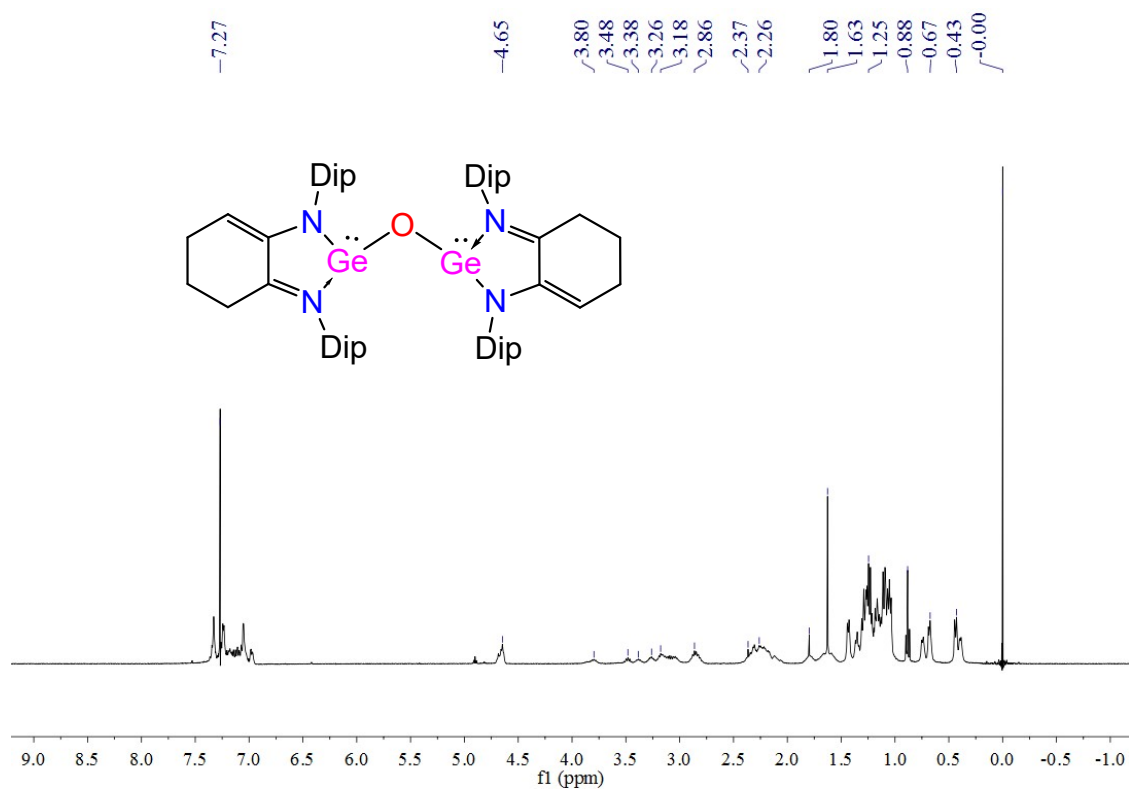

**Figure S17.**  $^1\text{H-NMR}$  (400 MHz) spectrum of the mixture of conformational and *cis-trans* isomers of **7** in  $\text{CDCl}_3$  at 273 K.

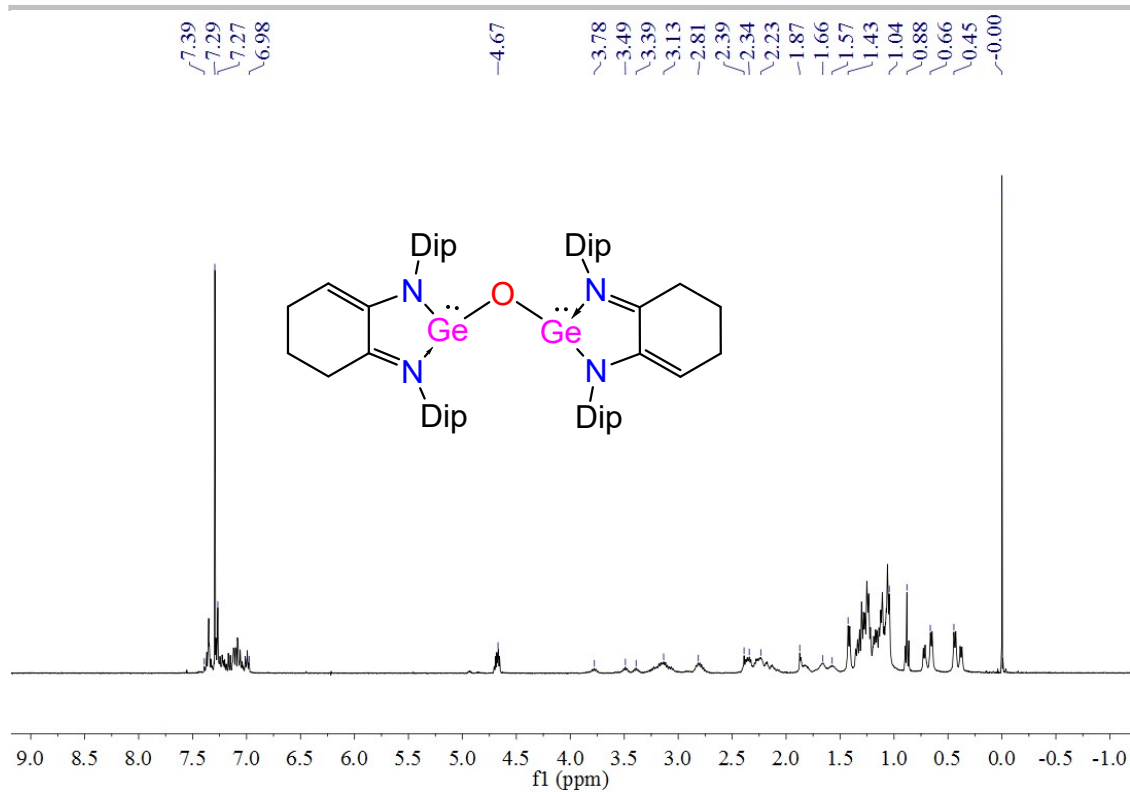

**Figure S18.** <sup>1</sup>H-NMR (400 MHz) spectrum of the mixture of conformational and *cis-trans* isomers of 7 in CDCl<sub>3</sub> at 223 K.

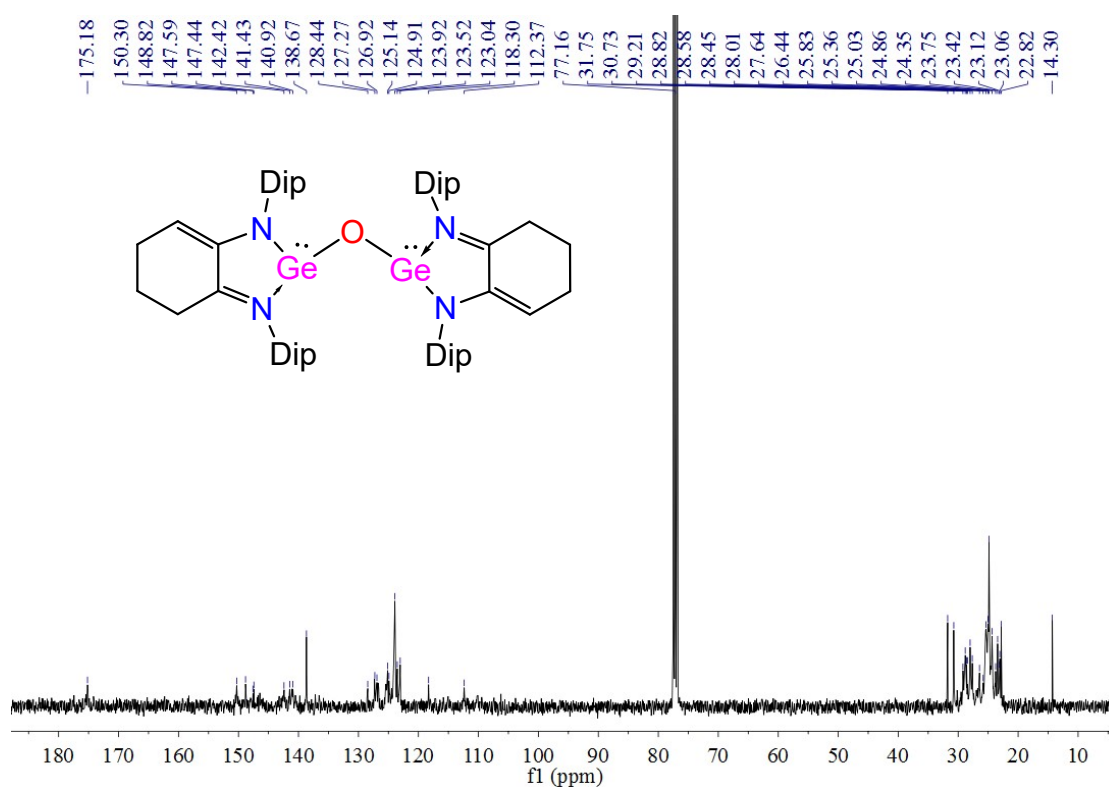

**Figure S19.** <sup>13</sup>C-NMR (100 MHz) spectrum of the mixture of conformational and *cis-trans* isomers of 7 in CDCl<sub>3</sub> at 298 K.

## D. Computational details

The geometries of **3**, **4** and **5** were optimized by hybrid functional M06-2x<sup>7</sup> with the def2-TZVP basis set.<sup>8</sup> Table S9-S10 list the key geometries of **3**, **4**, **5** and **C-Ge**, and the optimized structures are in agreement with single-crystal XRD results of **3** and **4**. The observation of experimental structural feature of **5** deviating from the theoretical values.

**Table S9.** Key geometries in internal coordinates (R is bond length in Å,  $\theta$  is bond angle in degrees °) of **3**, **4** and **5**.

| Bond parameters            | <b>3</b>   |        | <b>4</b>   |        | <b>5</b>   |        |
|----------------------------|------------|--------|------------|--------|------------|--------|
|                            | experiment | theory | experiment | theory | experiment | theory |
| R <sub>Ge1-N1</sub>        | 1.868(3)   | 1.873  | 1.855(2)   | 1.863  | 1.9123(19) | 2.004  |
| R <sub>Ge1-N2</sub>        | 1.869(3)   | 1.873  | 1.856(2)   | 1.864  | 1.9180(19) | 1.839  |
| R <sub>N1-C1</sub>         | 1.383(5)   | 1.388  | 1.406(3)   | 1.397  | 1.351(3)   | 1.299  |
| R <sub>N2-C2</sub>         | 1.384(5)   | 1.388  | 1.404(3)   | 1.397  | 1.351(3)   | 1.398  |
| R <sub>C1-C2</sub>         | 1.360(5)   | 1.357  | 1.473(3)   | 1.478  | 1.455(3)   | 1.452  |
| $\theta_{N(1)-Ge(1)-N(2)}$ | 83.08(12)  | 83.1   | 85.64(9)   | 85.5   | 82.32(8)   | 83.2   |

**Table S10.** Part of NPA charges and NICS(1) of C<sub>2</sub>N<sub>2</sub>Ge-rings in **3**, **4**, **5** and **C-Ge**.

| Atom                             | <b>3</b> | <b>4</b> | <b>5</b> | <b>C-Ge</b> |
|----------------------------------|----------|----------|----------|-------------|
| Ge                               | 1.036    | 1.220    | 1.297    | 1.140       |
| N1                               | -0.814   | -0.869   | -0.681   | -0.829      |
| N2                               | -0.814   | -0.869   | -0.892   | -0.829      |
| C1                               | 0.110    | 0.121    | 0.446    | 0.119       |
| C2                               | 0.110    | 0.121    | 0.018    | 0.119       |
| C <sub>2</sub> N <sub>2</sub> Ge | -0.372   | -0.276   | 0.188    | -0.280      |
| NICS(1)                          | -4.657   | -0.605   | -2.220   | -4.547      |

**Table S11.** The coordinates for DFT-calculated structures of **3**.

| Atom | x           | y           | z           |
|------|-------------|-------------|-------------|
| Ge   | 0.00007600  | -0.00191900 | -1.45635800 |
| N    | 1.24282400  | -0.01706300 | -0.05455400 |
| C    | 0.67814100  | -0.01381500 | 1.21339000  |
| N    | -1.24284300 | 0.01648100  | -0.05474800 |
| C    | -0.67829000 | 0.01626800  | 1.21327600  |
| C    | -1.51280400 | 0.05621700  | 2.45824100  |
| H    | -2.31732600 | 0.78750800  | 2.33991300  |
| H    | -2.00642400 | -0.91201200 | 2.61007300  |
| C    | 1.51257800  | -0.05118600 | 2.45848800  |
| H    | 2.00638800  | 0.91727200  | 2.60824400  |
| H    | 2.31695500  | -0.78288200 | 2.34169300  |
| C    | 2.65971400  | 0.01548000  | -0.20905700 |
| C    | 3.36275200  | -1.18092100 | -0.40888200 |

---

|   |             |             |             |
|---|-------------|-------------|-------------|
| C | 4.73843800  | -1.11281900 | -0.61245700 |
| H | 5.29717000  | -2.02457500 | -0.78447100 |
| C | 5.40297500  | 0.10107600  | -0.59661100 |
| H | 6.47277200  | 0.13552400  | -0.75855600 |
| C | 4.69879000  | 1.27121000  | -0.36321500 |
| H | 5.22867100  | 2.21543600  | -0.34289500 |
| C | 3.32296300  | 1.25101600  | -0.16144900 |
| C | 2.65583600  | -2.52199400 | -0.42449300 |
| H | 1.65944500  | -2.37631800 | -0.00216000 |
| C | 2.49188900  | -3.02522000 | -1.86072400 |
| H | 1.93822500  | -2.30918600 | -2.47061100 |
| H | 1.95737600  | -3.97710700 | -1.87751800 |
| H | 3.47019800  | -3.17404800 | -2.32395200 |
| C | 3.37190500  | -3.56646200 | 0.43229600  |
| H | 4.34435000  | -3.83213500 | 0.01395800  |
| H | 2.77697600  | -4.47996600 | 0.48147900  |
| H | 3.53013800  | -3.20402300 | 1.44911800  |
| C | 2.56167100  | 2.54445500  | 0.05692600  |
| H | 1.58982500  | 2.29381500  | 0.48667900  |
| C | 2.31387400  | 3.24539400  | -1.28174800 |
| H | 3.26379900  | 3.50033500  | -1.75737100 |
| H | 1.74682100  | 4.16688700  | -1.13466400 |
| H | 1.75660600  | 2.60417500  | -1.96720800 |
| C | 3.26840500  | 3.48628200  | 1.03151200  |
| H | 3.51424300  | 2.97968400  | 1.96615200  |
| H | 2.62524100  | 4.33732500  | 1.26102100  |
| H | 4.19375500  | 3.88288500  | 0.61014700  |
| C | -2.65975500 | -0.01599600 | -0.20918500 |
| C | -3.36267200 | 1.18037200  | -0.40976200 |
| C | -4.73840700 | 1.11232500  | -0.61288000 |
| H | -5.29708200 | 2.02402800  | -0.78532100 |
| C | -5.40308800 | -0.10150200 | -0.59612200 |
| H | -6.47292800 | -0.13590500 | -0.75779600 |
| C | -4.69901100 | -1.27156800 | -0.36215800 |
| H | -5.22899900 | -2.21572100 | -0.34109200 |
| C | -3.32313900 | -1.25139800 | -0.16057700 |
| C | -2.56204500 | -2.54473900 | 0.05902900  |
| H | -1.59013100 | -2.29374100 | 0.48843900  |
| C | -2.31448900 | -3.24720900 | -1.27886700 |
| H | -3.26450100 | -3.50259800 | -1.75408600 |
| H | -1.74754000 | -4.16860400 | -1.13077900 |

---

|   |             |             |             |
|---|-------------|-------------|-------------|
| H | -1.75722400 | -2.60687300 | -1.96514700 |
| C | -3.26889700 | -3.48538400 | 1.03468600  |
| H | -3.51456300 | -2.97774900 | 1.96880700  |
| H | -2.62591200 | -4.33633000 | 1.26506600  |
| H | -4.19436200 | -3.88223100 | 0.61379600  |
| C | -2.65536100 | 2.52121200  | -0.42698000 |
| H | -1.65917500 | 2.37587200  | -0.00403500 |
| C | -2.49069400 | 3.02211500  | -1.86396200 |
| H | -1.93728500 | 2.30480200  | -2.47257500 |
| H | -1.95564100 | 3.97367200  | -1.88209900 |
| H | -3.46880500 | 3.17075000  | -2.32766600 |
| C | -3.37140500 | 3.56731600  | 0.42779300  |
| H | -4.34352700 | 3.83276300  | 0.00855400  |
| H | -2.77610900 | 4.48064300  | 0.47575600  |
| H | -3.53027400 | 3.20662600  | 1.44514100  |
| C | -0.64853100 | 0.40577600  | 3.66905800  |
| H | -0.40592700 | 1.47270900  | 3.64040700  |
| H | -1.20942000 | 0.22801100  | 4.58799800  |
| C | 0.64819400  | -0.39799400 | 3.67004800  |
| H | 0.40563500  | -1.46499500 | 3.64384300  |
| H | 1.20903800  | -0.21807800 | 4.58859500  |

**Table S12.** The coordinates for DFT-calculated structures of **4**.

| Atom | x           | y           | z           |
|------|-------------|-------------|-------------|
| Ge   | 0.00068500  | -0.04829500 | -1.39085400 |
| N    | -1.26232800 | 0.01632100  | -0.02257600 |
| N    | 1.26522200  | -0.08440300 | -0.02234600 |
| C    | 2.67536700  | 0.01042700  | -0.20068100 |
| C    | 0.74000700  | 0.01141100  | 1.26905500  |
| C    | -2.67570000 | -0.01975000 | -0.19648400 |
| C    | -0.73695800 | -0.05310500 | 1.27048400  |
| C    | -3.32362100 | -1.25145100 | -0.35762400 |
| C    | -3.39142500 | 1.18723200  | -0.18976800 |
| C    | 3.26668400  | 1.26959700  | -0.37049900 |
| C    | -2.55997300 | -2.56028700 | -0.31710800 |
| H    | -1.57126400 | -2.35684000 | 0.09889200  |
| C    | 1.42003200  | 0.19817400  | 2.40857000  |
| H    | 2.49853200  | 0.29741900  | 2.39175100  |
| C    | -1.41695800 | -0.20437600 | 2.41522500  |
| H    | -2.49620400 | -0.29596000 | 2.40283900  |
| C    | -4.76365600 | 1.14180300  | -0.40884300 |

---

|   |             |             |             |
|---|-------------|-------------|-------------|
| H | -5.33518300 | 2.06100300  | -0.42016600 |
| C | 4.63966100  | 1.32925700  | -0.59416200 |
| H | 5.11414900  | 2.29091200  | -0.74775800 |
| C | -5.41321600 | -0.06575100 | -0.61266700 |
| H | -6.48136300 | -0.08218500 | -0.78793400 |
| C | -2.67683000 | 2.50850100  | 0.01607700  |
| H | -1.75488000 | 2.29894000  | 0.56113900  |
| C | 3.44500400  | -1.16260800 | -0.18802500 |
| C | 5.40734400  | 0.17796900  | -0.62220600 |
| H | 6.47341900  | 0.24194900  | -0.79935100 |
| C | -4.69859500 | -1.25023600 | -0.57899200 |
| H | -5.21557100 | -2.19049800 | -0.72585400 |
| C | 4.81354900  | -1.05652200 | -0.41028500 |
| H | 5.42625900  | -1.94892900 | -0.41693700 |
| C | 2.44724300  | 2.54481200  | -0.33556600 |
| H | 1.46293000  | 2.30001500  | 0.06838900  |
| C | 0.65978700  | 0.40121800  | 3.69262800  |
| H | 0.44872700  | 1.47300000  | 3.81421800  |
| H | 1.26966300  | 0.10671200  | 4.54768500  |
| C | -0.65548300 | -0.37311500 | 3.70382500  |
| H | -0.44396600 | -1.44097300 | 3.85445000  |
| H | -1.26482400 | -0.05570400 | 4.55102700  |
| C | 2.26096100  | 3.10396600  | -1.74843300 |
| H | 3.22776900  | 3.36305000  | -2.18642200 |
| H | 1.64308000  | 4.00378700  | -1.73071100 |
| H | 1.78639100  | 2.37325000  | -2.40722900 |
| C | -3.22790400 | -3.59027000 | 0.59390700  |
| H | -3.37970800 | -3.18489800 | 1.59502000  |
| H | -2.60110400 | -4.47996800 | 0.67414900  |
| H | -4.19684600 | -3.90595900 | 0.20323100  |
| C | 2.78897900  | -2.51208700 | 0.02781900  |
| H | 1.86121500  | -2.33792200 | 0.57554000  |
| C | 3.06094900  | 3.59735900  | 0.58782000  |
| H | 3.21609200  | 3.19360500  | 1.58911800  |
| H | 2.39734600  | 4.46037700  | 0.66372200  |
| H | 4.02120500  | 3.95348800  | 0.21077400  |
| C | -3.48791800 | 3.49845100  | 0.85000000  |
| H | -4.36737100 | 3.85521400  | 0.31068900  |
| H | -2.87788400 | 4.37100900  | 1.08844600  |
| H | -3.82053900 | 3.04709200  | 1.78563100  |
| C | -2.38090100 | -3.12198300 | -1.72995100 |

---

|   |             |             |             |
|---|-------------|-------------|-------------|
| H | -3.35299500 | -3.33750700 | -2.17971100 |
| H | -1.80226900 | -4.04747800 | -1.70854700 |
| H | -1.86792300 | -2.41005000 | -2.38028600 |
| C | -2.30432500 | 3.12957500  | -1.33306000 |
| H | -1.68063500 | 2.45909500  | -1.92818600 |
| H | -1.76098400 | 4.06582200  | -1.18999800 |
| H | -3.20581100 | 3.34285100  | -1.91222800 |
| C | 2.43594900  | -3.15347500 | -1.31703900 |
| H | 1.78638700  | -2.50853600 | -1.91255300 |
| H | 1.92832700  | -4.10866400 | -1.16837600 |
| H | 3.34328000  | -3.33554800 | -1.89789800 |
| C | 3.64503500  | -3.46313400 | 0.86183200  |
| H | 4.53519800  | -3.78616300 | 0.31883100  |
| H | 3.07262900  | -4.35870600 | 1.10801800  |
| H | 3.96400800  | -2.99368400 | 1.79329900  |

**Table S13.** The coordinates for DFT-calculated structures of **5**.

| Atom | x           | y           | z           |
|------|-------------|-------------|-------------|
| Ge   | -2.37151500 | -0.10732600 | 1.54257400  |
| N    | -1.51884300 | -1.44176500 | 0.31487300  |
| C    | -1.01541100 | -0.88490700 | -0.74541000 |
| N    | -2.11881500 | 1.03366200  | 0.12218500  |
| C    | -1.30731100 | 0.52939900  | -0.89841300 |
| C    | -0.87355500 | 1.19022500  | -1.98892600 |
| H    | -1.18521200 | 2.22127400  | -2.12810300 |
| C    | 0.00849300  | 0.56959800  | -3.01986300 |
| H    | 0.75758600  | 1.30122300  | -3.32972100 |
| H    | -0.60053200 | 0.36109200  | -3.91046400 |
| C    | 0.69344900  | -0.69341900 | -2.51999200 |
| H    | 1.18499200  | -1.21753300 | -3.33756600 |
| H    | 1.47768900  | -0.40517100 | -1.81752600 |
| C    | -0.28552800 | -1.62338900 | -1.81436800 |
| H    | -1.04030600 | -2.01147600 | -2.51296800 |
| H    | 0.21632100  | -2.49000500 | -1.38141900 |
| C    | -1.59298300 | -2.87822300 | 0.44779000  |
| C    | -2.65211500 | -3.52568600 | -0.20582800 |
| C    | -2.76916400 | -4.90172600 | -0.03915900 |
| H    | -3.58074900 | -5.42878000 | -0.52337000 |
| C    | -1.86110500 | -5.60788800 | 0.72974300  |
| H    | -1.96934300 | -6.67841900 | 0.84707600  |
| C    | -0.80400000 | -4.94917900 | 1.33225500  |

---

|   |             |             |             |
|---|-------------|-------------|-------------|
| H | -0.08319600 | -5.51290600 | 1.90885100  |
| C | -0.64155600 | -3.57326500 | 1.20237100  |
| C | 0.51532000  | -2.86615500 | 1.87212000  |
| H | 0.71929100  | -1.94978100 | 1.31658000  |
| C | 1.80433100  | -3.68570200 | 1.87506700  |
| H | 1.73392300  | -4.55243500 | 2.53428300  |
| H | 2.62480200  | -3.06658000 | 2.23836000  |
| H | 2.06275700  | -4.03363700 | 0.87378500  |
| C | 0.13183300  | -2.47811100 | 3.30273700  |
| H | -0.75828500 | -1.84504200 | 3.33212000  |
| H | 0.94518800  | -1.93102900 | 3.77967400  |
| H | -0.08156200 | -3.37589500 | 3.88771200  |
| C | -3.67800800 | -2.78132700 | -1.04144900 |
| H | -3.25521200 | -1.82342000 | -1.35348400 |
| C | -4.92837300 | -2.49027000 | -0.20846400 |
| H | -5.36515100 | -3.42311200 | 0.15355700  |
| H | -5.67530500 | -1.97101000 | -0.81069400 |
| H | -4.70500600 | -1.87188000 | 0.66576400  |
| C | -4.05586700 | -3.52975800 | -2.32026000 |
| H | -3.17140500 | -3.82649300 | -2.88553900 |
| H | -4.67147400 | -2.88962000 | -2.95362000 |
| H | -4.63667800 | -4.42732100 | -2.10473000 |
| C | -2.79161600 | 2.29026100  | -0.07733600 |
| C | -2.14647900 | 3.49298800  | 0.25426000  |
| C | -2.81072800 | 4.68742400  | -0.00067300 |
| H | -2.32865000 | 5.62392400  | 0.24562400  |
| C | -4.07382500 | 4.69806300  | -0.56880800 |
| H | -4.57231100 | 5.63880600  | -0.76434000 |
| C | -4.69787100 | 3.50539900  | -0.88111400 |
| H | -5.68869000 | 3.52080100  | -1.31865900 |
| C | -4.07533400 | 2.28179600  | -0.64326700 |
| C | -4.82478500 | 1.01106800  | -0.99547300 |
| H | -4.20051300 | 0.15490300  | -0.73568400 |
| C | -6.11868500 | 0.91087800  | -0.18338900 |
| H | -5.91166000 | 0.90870100  | 0.88875800  |
| H | -6.66528600 | -0.00002200 | -0.42980700 |
| H | -6.77463300 | 1.75730000  | -0.39217400 |
| C | -5.10643400 | 0.91749100  | -2.49597600 |
| H | -5.76703400 | 1.72172800  | -2.82463600 |
| H | -5.59341900 | -0.03150700 | -2.73152300 |
| H | -4.18251800 | 0.98328300  | -3.07303200 |

---



|    |             |             |             |
|----|-------------|-------------|-------------|
| C  | -0.79110300 | 3.49151500  | 0.92338600  |
| H  | -0.27249700 | 2.58610000  | 0.61032800  |
| C  | 0.08717000  | 4.67864800  | 0.53777500  |
| H  | 0.17080900  | 4.78090400  | -0.54522100 |
| H  | 1.09211000  | 4.53147900  | 0.93587100  |
| H  | -0.29454900 | 5.61550900  | 0.94827400  |
| C  | -0.96953500 | 3.44068200  | 2.44388700  |
| H  | -1.49906600 | 4.33215000  | 2.78861100  |
| H  | 0.00052100  | 3.39409000  | 2.94105200  |
| H  | -1.54760300 | 2.56763200  | 2.75655900  |
| Cl | 4.11581200  | -0.42719700 | -2.98999700 |
| Al | 5.17029400  | -0.34926700 | -1.15721300 |
| Cl | 6.41446800  | -2.01159000 | -0.82275700 |
| Al | 2.58571000  | 1.26507500  | 1.00602800  |
| Cl | 5.92535200  | 1.54084700  | -0.64873100 |
| Cl | 3.52544900  | -0.71034200 | 0.47261400  |
| Cl | 3.75019500  | 2.35672000  | 2.35693300  |
| Cl | 2.14336000  | 2.20465600  | -0.83799900 |
| Cl | 0.79598400  | 0.56391900  | 2.00615700  |

## E. References

- 1 R. Figueroa, R. D. Froese, Y. He, J. Klosin, C. N. Theriault and K. A. Abboud, *Organometallics*, 2011, **30**, 1695-1709.
- 2 V. Lemierre, A. Chrostowski, A. Dargelos, W. J. Leigh, P. Baylère and C. R. Harrington, *Appl. Organometal. Chem.*, 2004, **18**, 676-683.
- 3 C. A. P. Goodwin, K. C. Joslin, S. J. Lockyer, A. Formanuk, G. A. Morris, F. Ortu, I. J. Vitorica-Yrezabal and D. P. Mills, *Organometallics*, 2015, **34**, 2314-2325.
- 4 N. M. Scott, R. Dorta, E. D. Stevens, A. Correa, L. Cavallo and S. P. Nolan, *J. Am. Chem. Soc.*, 2005, **127**, 3516-3526.
- 5 O. V. Dolomanov, L. J. Bourhis, R. J. Gildea, J. A. K. Howard and H. Puschmann, *J. Appl. Crystallogr.*, 2009, **42**, 339-341.
- 6 G. M. A. Sheldrick, *Acta Crystallogr. Sect. A*, 2008, **64**, 112-122.
- 7 Y. Zhao and D. G. Truhlar, *Theor. Chem. Acc.*, 2008, **120**, 215-241.
- 8 F. Weigend and R. Ahlrichs, *Phys. Chem. Chem. Phys.*, 2005, **7**, 3297-3305.
