# Supplementary figures and images for: An α-diiminato germylene family: syntheses, structures, and reactivity towards C–C coupled digermylene and digermylene oxide
Source: Royal Society of Chemistry journal article supplement (doi:10.1039/d2dt00981a), 2022-01-01

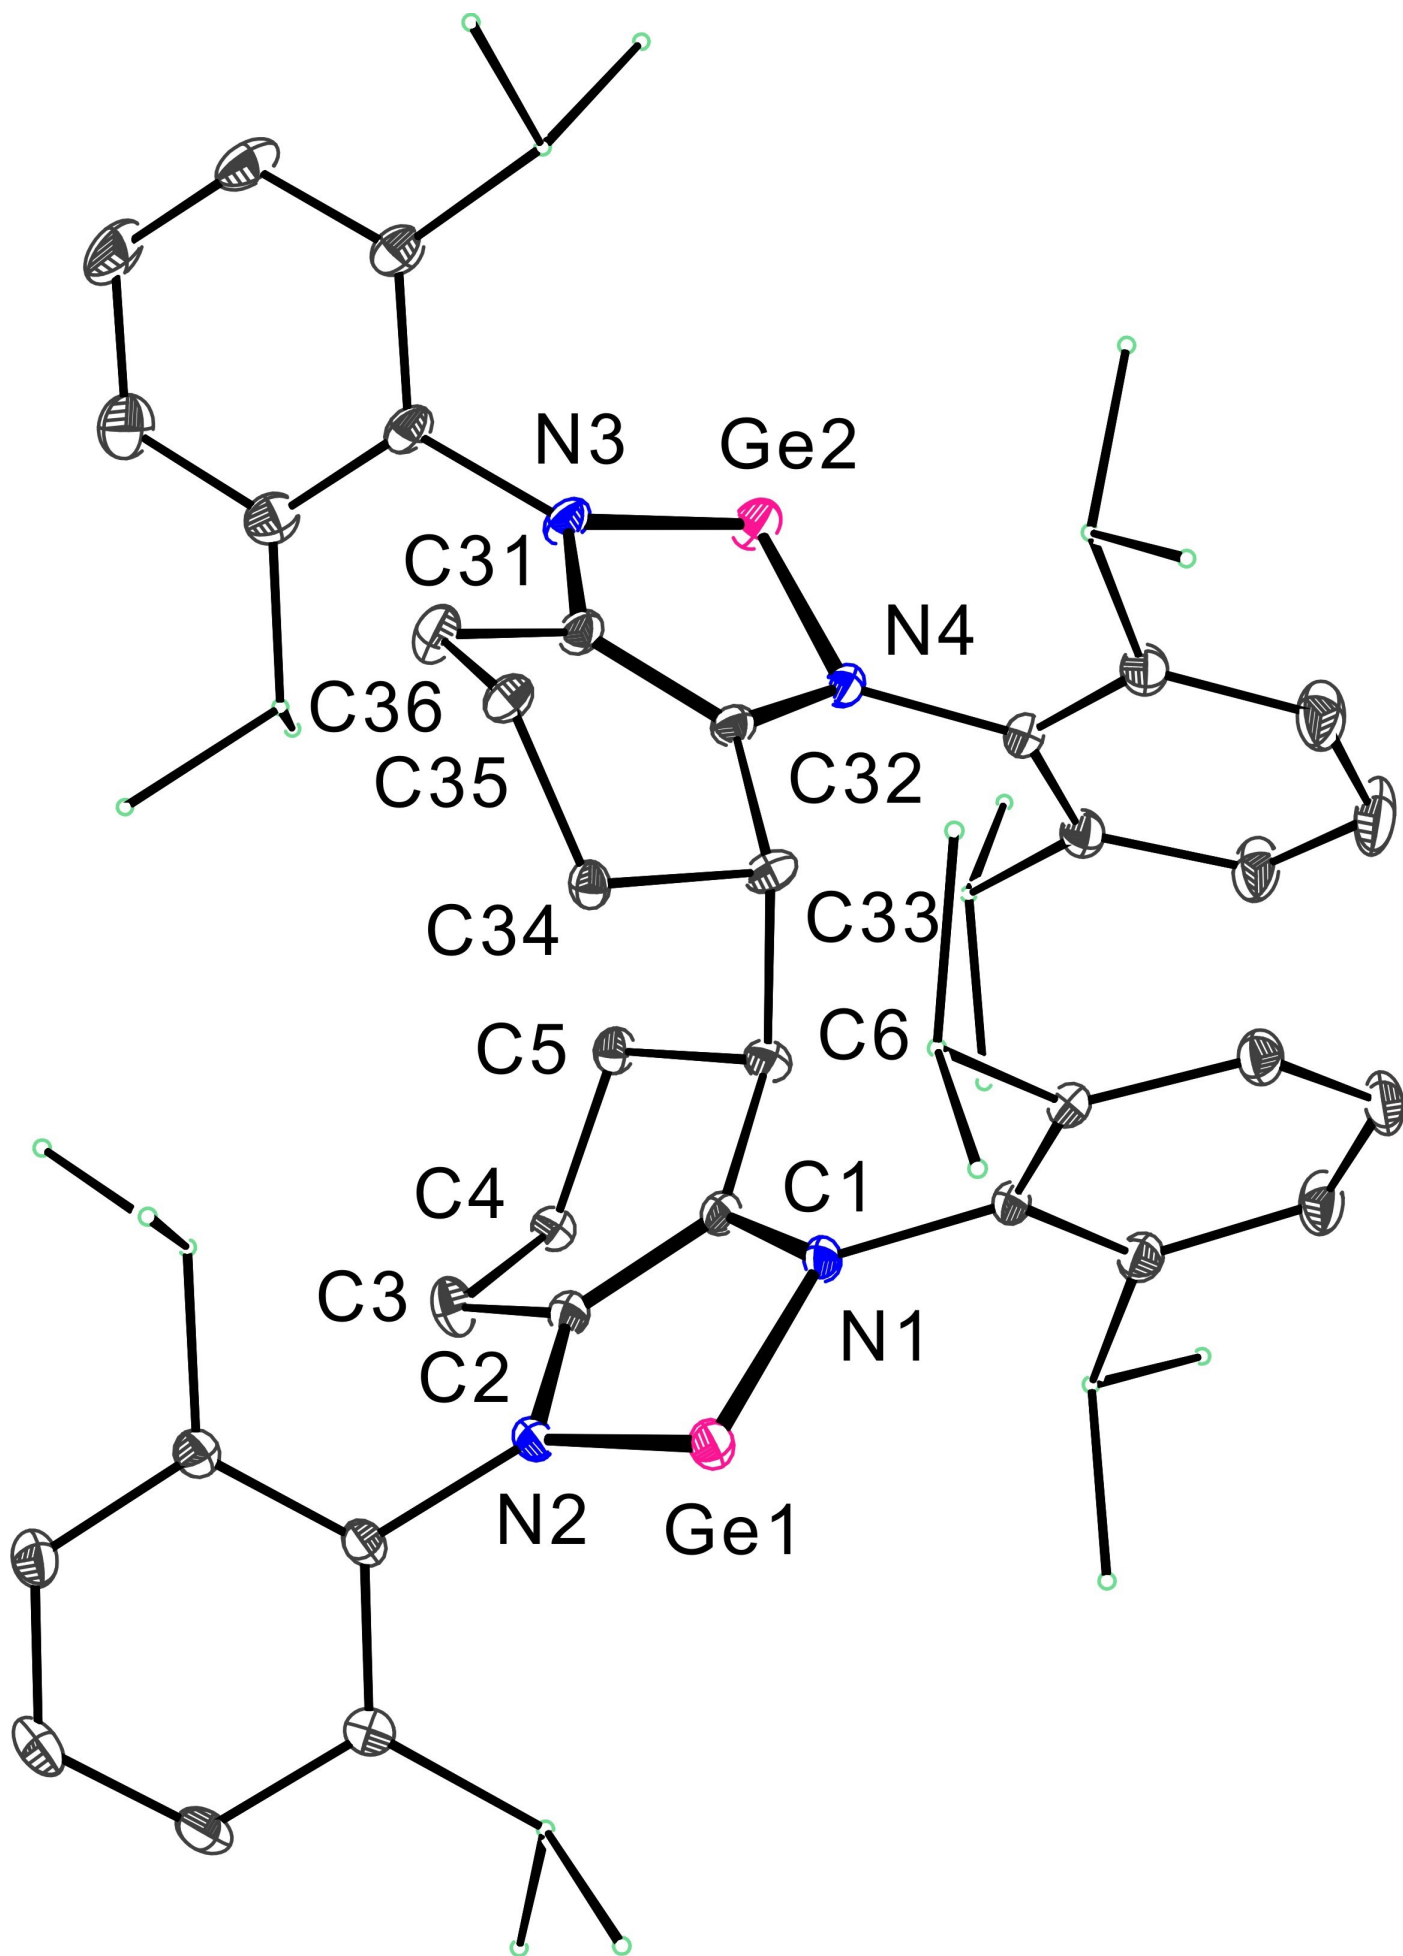

Supplement: d2dt00981a3.pdf [file d2dt00981a3.pdf]

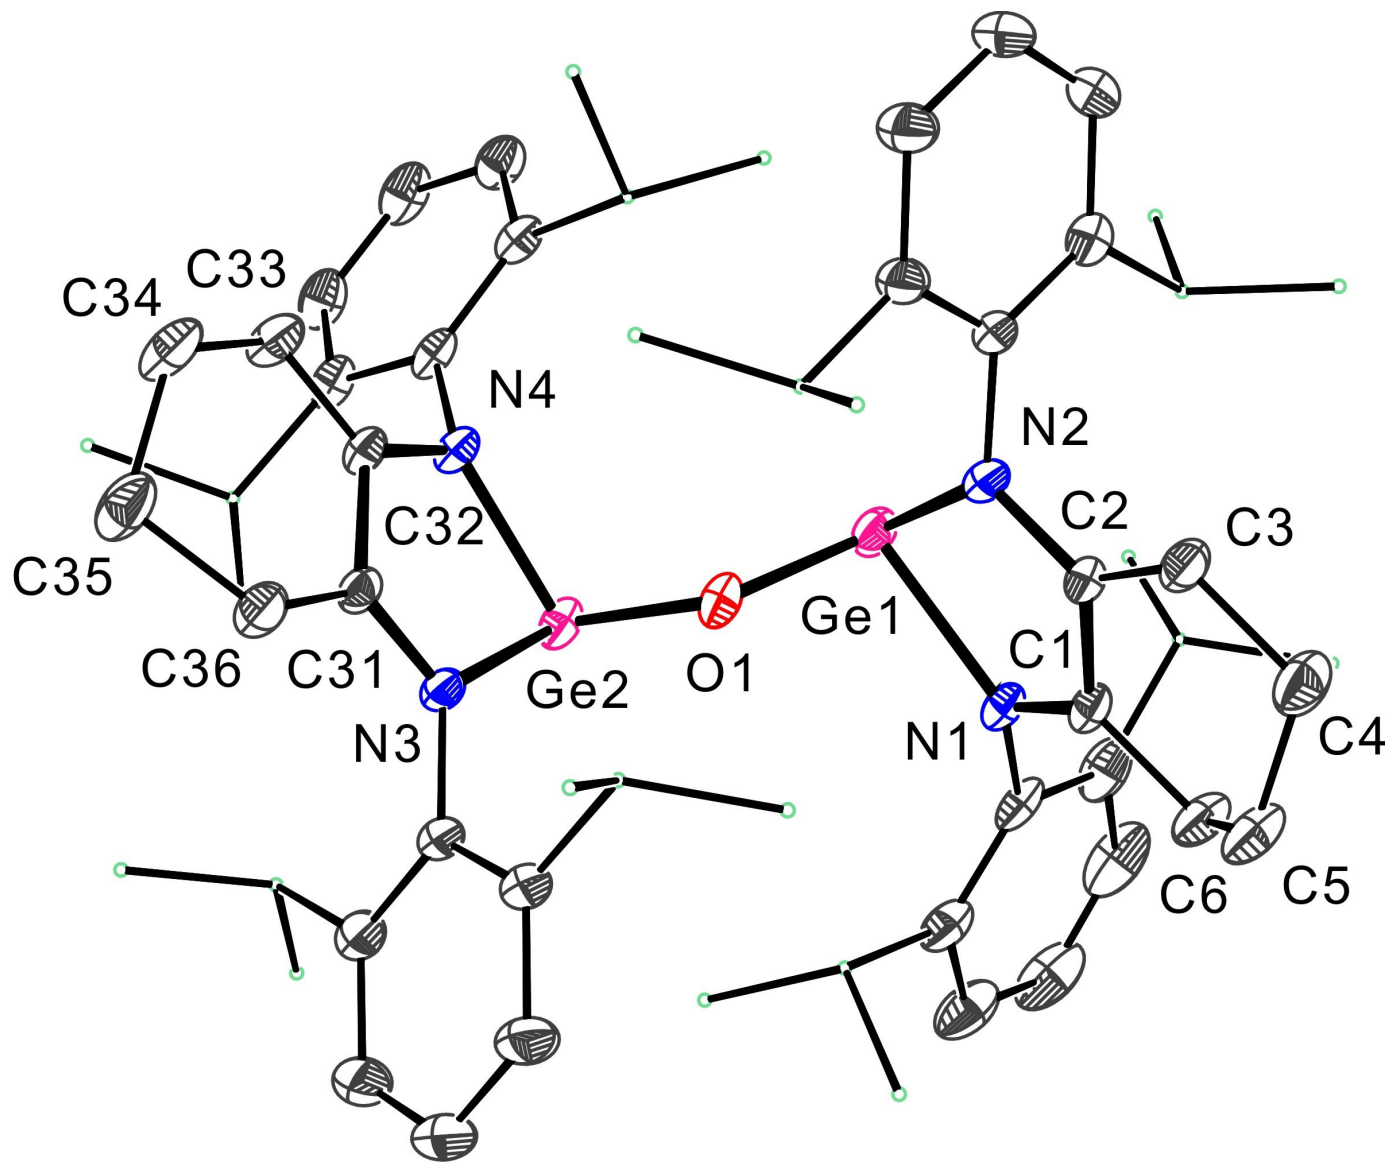

Supplement: d2dt00981a4.pdf [file d2dt00981a4.pdf]
